## RESEARCH ARTICLE

# Inventorization of traditional ethnobotanical uses of wild plants of Dawarian and Ratti Gali areas of District Neelum, Azad Jammu and Kashmir Pakistan

Muhammad Ajaib<sup>1</sup>, Muhammad Ishtiaq<sup>1\*</sup>, Khizar Hayat Bhatti<sup>2</sup>, Iqbal Hussain<sup>3</sup>, Mehwish Maqbool<sup>1</sup>, Tanveer Hussain<sup>1</sup>, Waheeda Mushtaq<sup>1</sup>, Abdul Ghani<sup>4</sup>, Muhammad Azeem<sup>3</sup>, Sardar Muhammad Rafique Khan<sup>5</sup>, Sumaira Thind<sup>3</sup>, Rohina Bashir<sup>3</sup>

**1** Department of Botany, Mirpur University of Science and Technology (MUST), Mirpur, Azad Jammu and Kashmir, Pakistan, **2** Department of Botany, University of Gujrat, Gujrat, Pakistan, **3** Department of Botany, Government College University, Faisalabad, Pakistan, **4** Department of Botany, University of Sargodha, Sargodha, Pakistan, **5** Department of Climate Change Centre, Environmental Protection Agency, AJK, Muzaffarabad, Pakistan

\* [drishtiaq.bot@must.edu.pk](mailto:drishtiaq.bot@must.edu.pk)

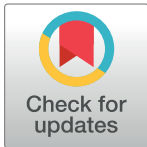

## Abstract

### Background

An ethnobotanical expedition was conducted to document the traditional ethnobotanical (TEB) uses of wild flora of Dawarian and Ratti Gali villages of District Neelum, Azad Jammu and Kashmir (AJK) Pakistan. District Neelum has rich plant diversity and is hub of many endemic plant species while the study areas are not yet explored. The research area: Dawarian and Rati Gali (DRG) area is mountaineous terrain and villages are located on far and farther distances. DRG area has rich biocultural and plant diversity comprising of different ethnic groups of Kashmir state. The current research was aimed to explore and document traditional medicines (TEMs) and other domestic and commercial uses of wild plants. This study will assist to evaluate conservation and commercial worth of wild flora which can be potential candidate for drug discovery through ethnopharmacological analysis.

### Methods

The current quantitative ethnobotanical research was carried out in 2018 by interviewing 150 indigenous informants (90 male and 60 female) of DRG area using questionnaire applying structured and semi structured interview methodology. Data analysis was analyzed by using quantitative ethnobotanical statistical tools such as fidelity level (FL), informant consensus factor (ICF), Spearman's rank correlation (SRC) and data matrix ranking (DMR).

### Results

The indigenous people of DRG area use wild plants in their daily life to cope life necessities i.e. food, vegetables, fodder, fuel, shelter, timber and herbal medicines. TEMs are primarily used to cure different infirmities like diabetics, asthma, dysentery, constipation, cold, fever,

## OPEN ACCESS

**Citation:** Ajaib M, Ishtiaq M, Bhatti KH, Hussain I, Maqbool M, Hussain T, et al. (2021) Inventorization of traditional ethnobotanical uses of wild plants of Dawarian and Ratti Gali areas of District Neelum, Azad Jammu and Kashmir Pakistan. PLoS ONE 16(7): e0255010. <https://doi.org/10.1371/journal.pone.0255010>

**Editor:** Khawaja Shafique Ahmad, University of Poonch Rawalakot, PAKISTAN

**Received:** May 16, 2021

**Accepted:** July 7, 2021

**Published:** July 29, 2021

**Copyright:** © 2021 Ajaib et al. This is an open access article distributed under the terms of the [Creative Commons Attribution License](https://creativecommons.org/licenses/by/4.0/), which permits unrestricted use, distribution, and reproduction in any medium, provided the original author and source are credited.

**Data Availability Statement:** All relevant data are within the paper.

**Funding:** The author(s) received no specific funding for this work.

**Competing interests:** The authors have declared that no competing interests exist.

joint pain, wound healing, cancer, cardiovascular disorders, epilepsy, kidney infections and many types of skin diseases. Current study revealed the data of 103 wild plants species belonging to 46 plant families from selected areas of District Neelum, AJK. Results depicted that Asteraceae ranked 1<sup>st</sup> (12 plants spp). Among plant parts used leaf ranked 1<sup>st</sup> (18%), followed by seed (17%) and root (13%). While prevalent form recipe mode was decoction (20%), followed by powder (17%) and extract (14%) and fodder was highest (37%) EB use-form fodder, followed by food (32%) and fuel (17%). Quantitative ethnobotanical analysis (QEA) was carried to find the reliability and novelty of the study. Five plant species including *Berberis lyceum* (FL = 97.78%), *Isodon rugosus* (FL = 95.71%), *Saussurea lappa* (FL = 94.74%), *Aconitum heterophyllum* (FL = 92.71%) and *Taxus baccata* (91.58%) had shown high fidelity level which confirmed that these plants have high medicinal worth in study area. The highest value (0.94) of ICF was for diseases group “tuberculosis and leucorrhoea”, followed by stomachache and flatulence (0.93), diabetics and blood pressure (0.92) and asthma and chest infections (0.88). For other uses fuel with ICF (0.83) ranked first and second was hedging and thatching (ICF = 0.82) where people use plants or their parts for construction. Spearman’s rank correlation (SRC) test indicated that number of TEB uses increases if number of species is increased. Jaccard index (JI) analysis depicted that 56.31% plants are being used as TEMs which are first time explored from the study area. While 26.21% plants are being used in different TEB uses which are different from past cited literature. These novel findings of research indicate that wild flora of the study area has great potential for novel drug discovery and provision of materialist services for the indigenous communities.

## Conclusion

The present research revealed that TEMs uses of 58 plants are novel being first time reported from the study area (DRG) of District Neelum of AJK. The results showed that plants like *Acer cappadocicum*, *Ajuga bracteosa* and *Swertia paniculata* are used to cure diabetes, *Viscum album*, *Viola canescens*, *Taxus baccata* are used for cure of cancer, *Isodon rugosus*, *Polygala chinensis* are used in TEMs for treating cardiovascular disorders and *Anaphalis triplinervis* is used for epilepsy. *Berberis lyceum*, *Ajuga bracteosa*, *Aconitum heterophyllum*, *Bistorta amplexicaule*, *Saussurea lapa* and *Jurinea dolomiaea* are severely threatened and there is urgent need to do conservation measures for available of valuable MPs to the indigenous communities for life necessities and for future research. The current study will also be useful addition in ethnobotanical database, preservation of traditional culture and drug discovery and drug development through future ethnopharmacological research.

## Introduction

Plants are very indispensable for life sustenance because rural communities of different countries primarily use local plants in multiple forms. The ethnobotany roots back to era when first man started his life on this planet and he used wild natural resources for life necessities. Ethnobotany plays a significant role between biological diversity, social culture and traditional medicine system [1,2]. It is cited and proved that indigenous knowledge of ethnomedicinal uses of

plants is usually transferred orally from one generation to other and there is risk of loss of bio-cultural and traditional ethnobotanical uses of wild indigenous plants (WIPs) [3]. Ethnobotanical study provides comprehensive information about cultural uses of plants as ethnomedicines, folklore food phytonyms, fodder, fuel, rituals usage and shelter [4]. The plants of medicinal worth have been used in novel drug discovery and development through ethnopharmacological analysis in previous. Furthermore, ethnobotanical study (EBS) is supportive and essential for knowledge based economy for research in other subjects like Biology, Agriculture and Pharmacology because EBS provides baseline data for further research [5]. WIPs are being used for different perspectives for existence of life activities according to their ethnicity and cultural paradigm around the globe [6]. In past research it is stated that 25% allopathic drugs are produced from plants or their byproducts and nearly 80% people of the world hitherto are dependent on TEMs obtained from fresh or dried plants or their products for cure of different diseases [7,8]. Many other necessary requirements of life such as shelter, forage, fodder, fuel, aesthetic use and fiber are gained from forests' vegetation or other WIPs of in different regions of the world [9,10]. WIPs of any area generally provide fuel and timber wood which primarily fulfill basic need of life and on secondary level it also provides sources of livelihood to local communities through timber and furniture industry [11]. Many past studies are supporting the theme that plants are pivotal source of phytotherapeutic to cure of various human and veterinary diseases. The EBS reveals the conservation status of WIPs in an area and it is reported that *Berberis lyceum*, *Ajuga bracteosa*, *Aconitum heterophyllum*, *Bistorta amplexicaule*, *Saussurea lapa* and *Jurinea dolomiaea* are severely threatened and are on verge of extinction due to overgrazing, excessive harvesting for forage, fire, cutting by timber mafia, building of infrastructure and agriculture expansion for crop cultivation [12–17].

The study areas (Dawarian and Ratti Gali) are part District Neelam which is one of the administrative units of state of Azad Jammu and Kashmir (AJK). AJK has diverse habitats, variable climatic conditions and appropriate fertile soil endowed with plant biodiversity out of which some are endemic to this region [18–20]. The current study is focused on two rural areas (DRG) of Neelum valley which is present in North-East of Muzaffarabad with altitude of 900–6325 meters occurring between 73°–75° E longitude and 32°–35° N scope [21]. Neelum valley is the biggest vale of Azad Jammu and Kashmir (AJK) covering a territory of 3737 Km. Dawarian is its one of the towns with 110 km and Ratti Gali is at 75 Km distance north of Muzaffarabad city at altitude of 5299 ft from sea level (Fig 1). The atmosphere is chilling winter with temp. 0–4°C and summer with 18–25°C and precipitation is 1650 mm per annum. Soil of the area is loamy appropriate for holding dampness which makes it useful woodland with thick vegetation [22].

It is mentioned in many studies that flora of different areas of Neelum valley are under severe anthropogenic pressure and other natural catastrophe accelerate this more which do have a high impact on the ecosystems structure and services for the indigenous people [23]. Vegetation of DRG mainly consist of herbs and shrubs with some tree species. Ratti Gali is famous place because of lake known as “Ratti Gali lake” (RGL) which is an alpine glacial lake (Fig 1). RGL nearby areas have rich plant biodiversity due to altitude and rich moisture.

Many wild indigenous plants (WIPs) are being used source of food, vegetables and fruits. Many of WIPs are commonly used as source of fuel, fodder and forage for domestic animals [24]. The indigenous people of DRG areas use local WIPs as traditional ethnomedicines (TEMs) to cure various chronic and acute infirmities and similar is practised in the other areas of AJK [24]. The literature persual and field survey analysis depicted that older indigenous people of AJK territory has more ethnobotanical knowledge of WIPs as compared to young generation because former have strong belief on traditional and cultural customs and prefer plant-based drugs which they deem safe and economic in use [24].

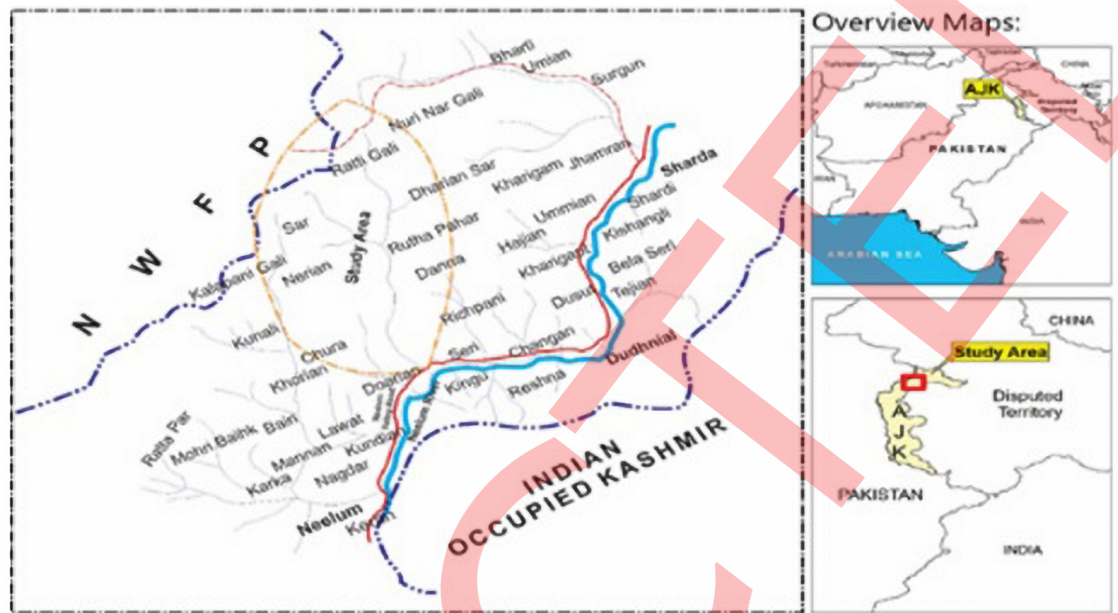

**Fig 1. Map of Darian and Rati Gali, District Neelum of Azad Jammu and Kashmir, Pakistan (note: Study sites are encircled).**

<https://doi.org/10.1371/journal.pone.0255010.g001>

It is first ethnobotanical study conducted on DRG areas of Neelum valley and only scarce literature is cited in some articles from other districts and some parts of NV of AJK. Many WIPs species of the study area were unexplored and here first time reported in this paper. The present research was focused ethnobotanical study in conjunction biocultural paradigms of indigenous ethnic groups along with geographical characteristics of different study sites encompassing on plant biodiversity. The key objectives of the study were to: (i) document bio-cultural data of traditions of indigenous communities, (ii) prepare floristic checklist of WIPs describing occurrence range, (iii) document ethnobotanical uses of WIPs, especially enlisting inventory of TEMs, (iv) on basis of ethnobotanical study, screening of potential medicinal plants for further phytochemical research and (v) determine their potential for drug discovery to combat multi-drug resistant (MDR) bacteria and other microbes. The research will also assist in conservation of precious WIPs of the area because they provides current population status of the species and key threats for plants of the study area.

## Materials and methods

The current ethnobotanical research study was conducted during the year 2019 from Dawarian to Rati Gali (DRG) sites of District Neelum of Azad Jammu and Kashmir, Pakistan. The area was selected to due to interesting reasons that (i) it is remote area located very far from main city, Muzaffarabad of AJK, (ii) diverse ethnic and biocultural diversity and rich plant biodiversity. Furthermore, the native people have traditional bioculture and customs primarily depend on wild plants for treatment of many diseases.

## Collection of ethnobotanical information

Traditional ethnobotanical (TEB) informations were gathered from local informants of the study area by using structured and semi-structured interview methodologies. The planned and random visits were made in the study and 150 informants (90 male and 60 female) with age range of 40-to-90 years were asked questions with assistance of local guide or translator. Prior



to field visit of different mountaineous areas of DRG; the heads/leaders of villages were contacted and purpose of this study was informed to all participants. The privacy and secrecy of their personal and culture was promised to be kept intact (however, permission for using this valuable information for thesis writing and publishing it in article form was obtained verbally). The data collected from the local people included: local name, local uses, recipe, plant part used, occurrence, characters involved in the collection, marketing and other related information. The plants of two hilly villages of Dawarian and Rati Gali of District Neelum were categorized according to their economic value such as medicinal, food, fodder, vegetable, fruit, thatching, hedging, timber and fuel wood. The collected information was compiled and compared to relevant literature to evaluate the authenticity and explore novelty of knowledge [24]. For ethnopharmacological purpose, the interviewer were enquired that how a particular plant species was used, dosage form, part used and herbal recipe for treatment of prevalent diseases [25]. The protocol of Thompson [25], Ishtiaq *et al.*, and Mehwish *et al.*, [26,27] with some modifications were employed for TEB data collection and analysis.

The collected plants were properly dried, pressed and mounted on the herbarium sheets following standard protocol [26,27]. The each specimen was identified by expert taxonomist using Flora of Pakistan (from library) and a voucher number was assigned to each plant and submitted in herbarium (MUH) of Department of Botany, Mirpur University of Science and Technology (MUST), Mirpur AJK (Pakistan) for future reference. The identified taxa were cross checked and verified using online information of plant flora from “the plant list” web repository (<http://www.theplantlist.org>) and world flora [www.worldfloraonline.org](http://www.worldfloraonline.org) [19,26,27] and authenticated plants were kept in herbarium according to proper procedure of herbarium.

### Data analysis

The collected data was tabulated and analyzed by using different quantitative ethnobotanical micro statistical tools i.e. fidelity level (FL), informant consensus factor (ICF), fidelity level (FL), family index (FI) and spearman’s rank correlation (SRC) were employed to find its novelty and authenticity of TEB and ethnomedicines [26,27].

**Fidelity level (FL).** The fidelity level is the level of witnesses guaranteeing the utilization of certain plant for a similar object or purpose. FL describes how a plant is commonly or certainly used for curing of a specific disease or infirmity in the stud area. FL was determined by using follow equation as per protocol cited by Ishtiaq *et al.*, and Mehwish *et al.*, [26,27]:

$$FL (\%) = N_p/N \times 100$$

where,  $N_p$  indicates the number of informants that claim “a use of the plant species” used for “a particular purpose/disease” and  $N$  is mentioned “the number of informants” that use the plant as a medicine to treat any given disease.

**Informants consensus factor (ICF).** ICF identifies the agreement of the informants on the reported herbal medicines for the cure of group of ailments. It was calculated by the following procedure of Ishtiaq *et al.*, and Mehwish *et al.*, [26,27] using following equation:

$$ICF = n_{ur} - n_t/n_{ur} - 1$$

where,  $n_{ur}$  is “the number of use citation” in each category and  $n_t$  denotes “number of species used” to cure particular group of disease or diseases. The method is recommend for further exploration of drug using different ethnopharmacological approaches [28].

**Family index (FI).** Family index is calculated to check which family has highest number plants being used as ethnomedicines to cure different diseases in the local communities of any study area [13,26,27].

**Direct Matrix Ranking (DMR).** Direct matrix ranking is applied to find out populace thickness of plant species and their protection status in the investigation territory. DMR depicts highest biotic pressure on the plants which are predominantly used by local people in the investigated area for the treatment of various ailments [24,26,27].

**Spearman's rank correlation (SRC) test.** In SRC test data is analyzed to find out fact that whether male informants have better knowledge than female interviewees or not. SRC is also explores correlation between total number of uses with total number of plants. It was proved that the number of uses of plants also increases as number of plants species increases. It is calculated as:

$$r_s = 1 - 6 \left[ \frac{\sum d^2}{n(n^2 - 1)} \right]$$

where  $d^2$  the square of the sum of the ranks and  $n$  is the number of informants [29].

## Results and discussion

The present ethnobotanical expedition was conducted on mountaineous areas of Dawarian and Ratti Gali (DRG), District Neelam of Azad Jammu and Kashmir, Pakistan in year 2019. EB data generated was compiled in form a checklist of plants, inventory of traditional ethnomedicines and biodiversity conservation status of indigenous plants of DRG areas. The study areas of DRG are hilly terrains with diverse climate and plant vegetation. The area is first time explored using quantitative ethnobotanical approach which resulted many novel data, as no such data is reported in previous literature. This is first document which describes the checklist of wild plants and their ethnobotanical uses are presented in quantitative form which provides clues for future detailed phytochemical and ethnopharmacological research. It was found that indigenous communities of the area generally use plants and their byproducts for different necessities of life.

In the study area (two villages: Dawarian and Rati Gali) a comparison based on six social characters was made prior to plants collection and identification for ethnomedicinal study (Table 1). These characters' observation directly correlates with plants distribution in the study area. It was observed that more families (52), number of informants (12), average number of families (15–8) and livestock dependence (90%) maximum in Dawarian site as comparison to Rati Gali which is less in all parameters except migration rate (90%) in Ratti Galli, which may be due to severe climatic conditions particularly in chilling snow falling in winter. These findings indicated that less number of plant diversity appeared in Dawarian site as compared with Ratti Galli (where mostly herbs and shrubs were prevalent). The hilly area people of DRG mostly depend on wild and natural resources, particularly on domestic animals for live sustenance. These findings were strongly supported by some ethnobotanist who conducted research on different areas of Azad Jammu and Kashmir [24,28,29].

**Table 1. Social characteristics of the variable samples between two study sites: Rati Galli and Dawarian of District Neelam of Azad Jammu and Kashmir.**

| S. No | Social characteristics                    | Dawarian | Rati Gali |
|-------|-------------------------------------------|----------|-----------|
| 1     | Number of families                        | 52       | 8         |
| 2     | Number of informants                      | 12       | 5         |
| 3     | Reliance on livestock as an income source | 90%      | 30%       |
| 4     | Average age of informants                 | 70–50    | 60–30     |
| 5     | Average number of family members          | 15–8     | 10–3      |
| 6     | Migration ratio                           | 70%      | 90%       |

<https://doi.org/10.1371/journal.pone.0255010.t001>

**Table 2. Geographical characteristics observation of the two study sites: Rati Gali and Dawarian of District Neelam of Azad Jammu and Kashmir.**

| S. No. | Sites     | Elevation (m) | Geographical characteristics                                                                                                                                                                                         |
|--------|-----------|---------------|----------------------------------------------------------------------------------------------------------------------------------------------------------------------------------------------------------------------|
| 1      | Dawarian  | 1615          | The village has very fertile soil and thick vegetation. Village has ever green thick forest of <i>Pinus wallichiana</i> . It is mountainous area. Population of the village is small sized but the area is huge.     |
| 2      | Rati Gali | 3700          | This area is located at high altitude. Vegetation mainly consist of herbs or shrubs. There is very low population but area is huge. People migrate here with their domestic animals in summers from different areas. |

<https://doi.org/10.1371/journal.pone.0255010.t002>

Different geographic characteristics like topography, area climates, population size, altitude or elevation and vegetation size were measured (Table 2). It was determined by the research that landmark diversification of plant species was seen in Dawarian and Rati Gali sites. The phytodiversity variation may be attributed to altitudinal variations such as Dawarian has 1615 meters height with loam rich soil having *Pinus wallichiana* forest. The human population is scattered in diverse area. While Rati Gali is located at 3700 meters having mostly herbs and shrubby vegetation with cool climatic conditions. This climatic, geographic characteristics and elevation differences resulted in plant biodiversity and in Ratti Gali area winter is severe and cold. It is worth to state people from other low land and hot climate areas migrate to these areas during summer for fostering their domestic animals by grazing of lush green grasses and herbs [22].

### Plants collection, identification and preservation

A total of 103 wild indigenous plants (WIPs) were plants were gathered from the selected towns (Dawarian and Ratti Gali) of District Neelam of AJK using standard protocols. The plants were identified using standard protocols as described in above methodology section. The dried and prepared specimens were submitted in Herbarium, Department of Botany voucher numbers for future reference and study. The floristic profile of WIPs was prepared comprising of family name, habit (herb, shrub or tree) and local name of each plant (Table 3). The results depicted that highest number of plants was seen for family Asteraceae (12 species), followed by Lamiaceae (10 spp) and Polygonaceae and Papilionaceae 6 spp each). Similar findings were counted by other taxonomists in other countries where Asteraceae was prevalent and dominant family with its universal distribution [30].

### Traditional ethnobotanical data (TEB)

Traditional ethnobotanical (TEB) data of wild indigenous plants (WIPs) was prepared in form of inventory which comprised of botanical name, voucher number, local name, family name, part used, gathering period, mode of use and traditional recipe or uses (Table 4). The results indicated that family Asteraceae showed highest percentage (11.65%), Lamiaceae (8.73%) whereas Polygonaceae (6.79%) species of plant species, respectively. Buxaceae, Boraginaceae, Brassicaceae, Convolvulaceae, Fumariaceae, Geraniaceae, Pteridaceae, Plantaginaceae, Spindaceae, Salicaceae and Violaceae showed 1.94% while Amaryllidaceae, Araceae, Aquifoliaceae, Buddlejaceae, Butelaceae, Campanulaceae, Colchicaceae, Celastraceae, Crassulaceae, Cupressaceae, Caryophyllaceae, Gentianaceae, Juncaceae, Oxalidaceae, Orobanchaceae, Orchidaceae, Primulaceae, Rutaceae, Saxifragaceae, Sabiaceae, Symplocaceae, Taxaceae and Viscaceae 0.97% of plant species being used in different TEB. The family wise inventory with species richness is presented in pie-chart form (Fig 2).

**Table 3. Familywise Inventory of wild indigenous plants of Dawarian to Ratti Gali, District Neelam of Azad Jammu and Kashmir, Pakistan (note: Herbarium voucher numbers are cited in Table 4).**

| Sr No | Family          | Sr No | Botanical Name of Plant Species                     | Habit | Local name       |
|-------|-----------------|-------|-----------------------------------------------------|-------|------------------|
| 1     | Asteraceae      | 1     | <i>Achillea millefolium</i> L.                      | Herb  | Gandana          |
|       |                 | 2     | <i>Artemisia japonica</i> Thunb.                    | Herb  | Chaou            |
|       |                 | 3     | <i>Anaphalis triplinervis</i> Clarke                | Herb  | Butt mehndi      |
|       |                 | 4     | <i>Artemisia macrophylla</i> Fisch. Ex Besser       | Herb  | Chita chaou      |
|       |                 | 5     | <i>Gerbera gossypina</i> (Royle) Beauverd           | Herb  | Kofe             |
|       |                 | 6     | <i>Ligularia thomsonii</i> (Clarke) Pojark.         | Herb  | Jungli surajmukh |
|       |                 | 7     | <i>Matricaria chamomilla</i> L.                     | Herb  | Tamak boti       |
|       |                 | 8     | <i>Saussurea lappa</i> (Decne.) Sch.Bip.            | Herb  | Khut             |
|       |                 | 9     | <i>Cirsium arvense</i> (L.) Scop.                   | Herb  | Jungli kandyara  |
|       |                 | 10    | <i>Sonchus asper</i> (L.) Hill                      | Herb  | Dhodai           |
|       |                 | 11    | <i>Senecio chrysanthemoides</i> DC.                 | Herb  | Chir hand        |
|       |                 | 12    | <i>Solidago virgaurea</i> L.                        | Herb  | Pinja phool      |
| 2     | Amaryllidaceae  | 13    | <i>Allium griffithianum</i> Boiss.                  | Herb  | Jungli pyaz      |
| 3     | Araceae         | 14    | <i>Arisaema tortuosum</i> (Wall.) Schott            | Herb  | Sanp ki boti     |
| 4     | Aquifoliaceae   | 15    | <i>Ilex dipyrrena</i> Wall.                         | Tree  | Kandaro          |
| 5     | Anacardiaceae   | 16    | <i>Rhus succedanea</i> L.                           | Tree  | Alkhal           |
| 6     | Berberidaceae   | 17    | <i>Berberis Austra</i> Royle                        | Shrub | Sumbal           |
|       |                 | 18    | <i>Podophyllum hexandrum</i> Royle                  | Shrub | Ban kukri        |
|       |                 | 19    | <i>Podophyllum emodi</i> Wall. Ex Hook.f. & Thomson | Shrub | Tra patra        |
| 7     | Buddlejaceae    | 20    | <i>Buddleja crispa</i> Benth.                       | Shrub | Gansu            |
| 8     | Buxaceae        | 21    | <i>Buxus wallichiana</i> Baill.                     | Herb  | Chiriri          |
|       |                 | 22    | <i>Sarcococca saligna</i> Müll.Arg.                 | Shrub | Shangal          |
| 9     | Boraginaceae    | 23    | <i>Cynoglossum lanceolatum</i> Forssk.              | Herb  | Chiro            |
|       |                 | 24    | <i>Onosma bracteata</i> Wall.                       | Herb  | Gao zuban        |
| 10    | Betulaceae      | 25    | <i>Corylus colurna</i> L.                           | Tree  | Aurni            |
| 11    | Brassicaceae    | 26    | <i>Erysimum hieracifolium</i> L. f.                 | Herb  | Mirchi           |
|       |                 | 27    | <i>Erysimum hedeanum</i> Al-Shehbaz                 | Herb  | Maneera          |
| 12    | Convolvulaceae  | 28    | <i>Convolvulus arvensis</i> L.                      | Herb  | Berrhi           |
|       |                 | 29    | <i>Cuscuta reflexa</i> Roxb.                        | Herb  | Neela tari       |
| 13    | Campanulaceae   | 30    | <i>Campanula pallida</i> Wall.                      | Herb  | Bikh             |
| 14    | Colchicaceae    | 31    | <i>Colchicum luteum</i> Baker                       | Herb  | Sorinjan         |
| 15    | Celastraceae    | 32    | <i>Euonymus hemsleyanus</i> Loes.                   | Tree  | Seeki            |
| 16    | Crassulaceae    | 33    | <i>Hylotelephium ewersii</i> (Ledeb.) H.Ohba        | Herb  | Loon salooni     |
| 17    | Cupressaceae    | 34    | <i>Juniperus communis</i> L.                        | Tree  | Bentheri         |
| 18    | Caprifoliaceae  | 35    | <i>Morina persica</i> L.                            | Herb  | Bekh-e-Akwar     |
|       |                 | 36    | <i>Valeriana jatamansi</i> Jones                    | Herb  | Panchi hola      |
|       |                 | 37    | <i>Viburnum cotinifolium</i> D. Don                 | Shrub | Ukloo            |
| 19    | Caryophyllaceae | 38    | <i>Silene vulgaris</i> (Moench) Garcke              | Herb  | Murkun           |
| 20    | Fumariaceae     | 39    | <i>Corydalis govaniana</i> Wall.                    | Herb  | Bhutkas          |
|       |                 | 40    | <i>Corydalis vaginans</i> Royle                     | Herb  | Mameri           |
| 21    | Geraniaceae     | 41    | <i>Geranium rotundifolium</i> L.                    | Herb  | Ratan jut        |
|       |                 | 42    | <i>Geranium villosum</i> Ten.                       | Herb  | Gull-e-attar     |
| 22    | Gentianaceae    | 43    | <i>Swertia paniculata</i> Wall.                     | Herb  | Charyta          |
| 23    | Juncaceae       | 44    | <i>Juncus lacustris</i> L.                          | Herb  | Jungli ghas      |

(Continued)



Table 3. (Continued)

| Sr No | Family         | Sr No | Botanical Name of Plant Species                            | Habit | Local name        |
|-------|----------------|-------|------------------------------------------------------------|-------|-------------------|
| 24    | Lamiaceae      | 45    | <i>Ajuga parviflora</i> Benth.                             | Herb  | Chita chaou       |
|       |                | 46    | <i>Ajuga bracteosa</i> Wall                                | Herb  | Janeadam          |
|       |                | 47    | <i>Clinopodium vulgare</i> L.                              | Herb  | Asaba-el-fetiyal  |
|       |                | 48    | <i>Elsholtzia strobilifera</i> Benth.                      | Herb  | Perilla           |
|       |                | 49    | <i>Isodon rugosus</i> Codd.                                | Shrub | Pemar             |
|       |                | 50    | <i>Mentha longifolia</i> L.                                | Herb  | Pahari podina     |
|       |                | 51    | <i>Origanum vulgare</i> L.                                 | Herb  | Nazbu             |
|       |                | 52    | <i>Phlomis bracteosa</i> Royle.                            | Shrub | Kukarjari         |
|       |                | 53    | <i>Scutellaria linearis</i> Benth.                         | Herb  | Birch             |
|       |                | 54    | <i>Thymus linearis</i> Benth.                              | Herb  | Ban jamani        |
| 25    | Oxalidaceae    | 55    | <i>Oxalis corniculata</i> L.                               | Herb  | Khatimili         |
| 26    | Orobanchaceae  | 56    | <i>Pedicularis brevifolia</i> D.Don                        | Herb  | Khasturi          |
| 27    | Orchidaceae    | 57    | <i>Satyrium nepalense</i> D.Don                            | Herb  | Gagun             |
| 28    | Papilionaceae  | 58    | <i>Astragalus graveolens</i> Benth.                        | Herb  | Ban phali         |
|       |                | 59    | <i>Astragalus heratensis</i> Bunge                         | Shrub | Phut Kanda        |
|       |                | 60    | <i>Indigofera heterantha</i> Brandis                       | Shrub | Kanthi            |
|       |                | 61    | <i>Lespedeza juncea</i> (L.f.) Pers.                       | Herb  | Kanthi ranga      |
|       |                | 62    | <i>Vicia sativa</i> L.                                     | Herb  | Chiri panja       |
|       |                | 63    | <i>Trifolium repens</i> L.                                 | Herb  | Sinja             |
| 29    | Pteridaceae    | 64    | <i>Adiantum aethiopicum</i> L.                             | Herb  | Kahkawa           |
|       |                | 65    | <i>Onychium japonicum</i> (Thunb.) Kunze                   | Herb  | Kangu             |
| 30    | Polygonaceae   | 66    | <i>Aconogonon alpinum</i> (All.) Schur                     | Herb  | Chikro            |
|       |                | 67    | <i>Bistorta amplexicaulis</i> (D.Don) Greene               | Herb  | Masloon           |
|       |                | 68    | <i>Oxyria digyna</i> (L.) Hill                             | Herb  | Kakri             |
|       |                | 69    | <i>Persicaria mitis</i> (Schränk) Holub                    | Herb  | Pahari masloon    |
|       |                | 70    | <i>Rheum emodi</i> Wall.                                   | Herb  | Chit patra        |
|       |                | 71    | <i>Rheum lacustral</i> D. Don                              | Herb  | Chutyal           |
| 31    | Polygalaceae   | 72    | <i>Polygala chinensis</i> L.                               | Herb  | Sanp ki jari      |
| 32    | Pinaceae       | 73    | <i>Abies pindrow</i> Royle                                 | Tree  | Partal            |
|       |                | 74    | <i>Cedrus deodara</i> Don                                  | Tree  | Davdaar           |
|       |                | 75    | <i>Pinus wallichiana</i> Jacks.                            | Tree  | Kayal             |
|       |                | 76    | <i>Pinus roxburghii</i> Sarg.                              | Tree  | Cheer             |
|       |                | 77    | <i>Picea smithiana</i> (Wall.) Boiss.                      | Tree  | Kachal            |
|       |                | 78    | <i>Bromus pectinatus</i> Thunb.                            | Herb  | Pero              |
| 33    | Poaceae        | 79    | <i>Cenchrus pennisetiformis</i> Steud.                     | Herb  | Lidder            |
|       |                | 80    | <i>Digitaria gustral6</i> (Nees) A.Camus                   | Herb  | Ghaa              |
|       |                | 81    | <i>Sorghum halepense</i> (L.) Pers.                        | Herb  | Baru              |
| 34    | Primulaceae    | 82    | <i>Primula gustral66e6</i> Sm.                             | Herb  | Mamera            |
| 35    | Plantaginaceae | 83    | <i>Plantago gustral66e</i> L.                              | Herb  | Kala chamchi part |
|       |                | 84    | <i>Wulfenia amherstiana</i> Benth.                         | Herb  | -----             |
| 36    | Ranunculacea   | 85    | <i>Actaea spicata</i> L.                                   | Herb  | Moneeri           |
|       |                | 86    | <i>Aconitum heterophyllum</i> Wall. Ex Royle               | Herb  | Ptrees            |
|       |                | 87    | <i>Caltha alba</i> Cambess.                                | Herb  | Makanpath         |
| 37    | Rosaceae       | 88    | <i>Cotoneaster microphyllum</i> Wall. Ex Lindl.            | Herb  | Loni              |
|       |                | 89    | <i>Rosa microphylla</i> Roxb. Ex Lindl.                    | Shrub | Shigari           |
|       |                | 90    | <i>Rubus niveus</i> subsp. <i>Horsfieldii</i> (Miq.) Focke | Shrub | Pakana            |
|       |                | 91    | <i>Fragaria nubicola</i> (Lindl.) Lacaita                  | Herb  | Mehwa             |

(Continued)

Table 3. (Continued)

| Sr No | Family        | Sr No | Botanical Name of Plant Species           | Habit | Local name  |
|-------|---------------|-------|-------------------------------------------|-------|-------------|
| 38    | Rutaceae      | 92    | <i>Skimmia laureola</i> Franch.           | Shrub | Neri        |
| 39    | Sapindaceae   | 93    | <i>Acer cappadocicum</i> Gled.            | Tree  | Tera Kanna  |
|       |               | 94    | <i>Aesculus indica</i> Hook.              | Tree  | Ban khaur   |
| 40    | Saxifragaceae | 95    | <i>Bergenia Gustral</i> Sternb.           | Herb  | Betbewa     |
| 41    | Sabiaceae     | 96    | <i>Meliosma simplicifolia</i> Walp.       | Shrub | Bakhaish    |
| 42    | Salicaceae    | 97    | <i>Populus alba</i> L.                    | Tree  | Sufaida     |
|       |               | 98    | <i>Salix tetrasperma</i> Roxb.            | Tree  | Bheens      |
| 43    | Symplocaceae  | 99    | <i>Symplocos paniculata</i> (Thunb.) Miq. | Shrub | Ludder      |
| 44    | Taxaceae      | 100   | <i>Taxus baccata</i> L.                   | Tree  | Thuni       |
| 45    | Violaceae     | 101   | <i>Viola biflora</i> L.                   | Herb  | Phul naqsh  |
|       |               | 102   | <i>Viola canescens</i> Wall.              | Herb  | Thandi jari |
| 46    | Viscaceae     | 103   | <i>Viscum album</i> L.                    | Shrub | Purakh      |

<https://doi.org/10.1371/journal.pone.0255010.t003>

In this exploration, TEB uses of 103 plant species belonging to 46 families were recorded and presented in alphabetical order. Asteraceae was the dominant family of study area with 12 plant species. The leaf decoction of *Artemisia macrophylla* Fisch ex. Besser is used to cure of cough and asthma. The leaf extract or juice of *Artemisia japonica* Thunb is used for whooping cough and asthma disorders. The similar ethnomedicinal study had reported in past on different areas of Azad Jammu and Kashmir, Pakistan where similar uses are cited [13,26–28].

The present study revealed that 78 species (75%) had single ethnobotanical use, 21 species (20%) had dual use and four species (3%) had multiple uses. The plants have been used in different categories such as food, medicines, fruits, vegetables, timber wood, fodder, shelter or house construction and fuel source (Table 4). Similar ethnobotanical studies were conducted on the plants of District Kotli and District Bhimber of Azad Jammu and Kashmir, Pakistan [6,26–28]. In which it was investigated that 93 plant species of 46 families had different form of uses i.e. 52.68% plants were known for single usage, 37.63% plants had dual use, 7.52% for triple usage and 2.15% plants taxa were known for multiple ethnobotanical uses. It was proved that rural people primarily depend on wild indigenous plants for food, fodder and medicines to cope their life necessities. Some of WIPs have also been reported as ethnoveterinary medicines (EVMs). Similar findings have been reported in other ethnobotanical studies in different areas of Khyber Pakhtunkhwa province of Pakistan [31].

### Summary of ethnobotanical investigation

To summarize ethnobotanical data, on the basis of single or more recipe uses, all 103 plants species were categorized into four types. The data is presented in four types with 75.72% plants were being used in single recipes, 20.38% were used in dual usages (in admixture form) and 3.88% plants had been reported having multiple usages. A pictorial form data is shown in pie-chart shape (Fig 3).

### Single-usage plants

The study revealed that out of 103 plants, about 78 plants were having their single form recipe being used to cure different infirmities by the local communities. Out of 78 plants, medicinal plants were 45 (57.69%), whereas food, fodder and fuel were 15 (19.23%), 15 (19.23%) and 3 (3.84%), respectively. A pie-chart of all single-usage plants is given in Fig 4. It is believed that either these single use-plants have very high medicine potential so individually used for cure of

**Table 4. Traditional ethnobotanical uses of wild indigenous plant species recorded from Dawarian and Ratti Gali, District Neelam Azad Jammu and Kashmir, Pakistan.**

| S. No | Species name                                              | Family         | Collecting Period | Part used               | Traditional ethnobotanical uses                                                                                                                                                                                                                                                                                        |
|-------|-----------------------------------------------------------|----------------|-------------------|-------------------------|------------------------------------------------------------------------------------------------------------------------------------------------------------------------------------------------------------------------------------------------------------------------------------------------------------------------|
| 1.    | <i>Acer cappadocicum</i> Gled. MUH-1775                   | Sapindaceae    | Summer            | Leaf, Stem, twigs       | The gum of tree is used as body tonic. Leaf extract is used for curing of diabetes, dysentery and diarrhea. Leaf and young twigs are used as fodder for animals. Dry wood is used as source of fuel for domestic needs.                                                                                                |
| 2.    | <i>Ajuga bracteosa</i> Wall. MUH-1776                     | Lamiaceae      | Summer            | Root, leaf, flower      | Root extract is used for purification of blood. Paste of leaves helpful to cure headache while powder of whole plant is given to treat abdominal pain. The flower powder is used for cure of diabetes. The root tea is used for killing of stomach worms.                                                              |
| 3.    | <i>Ajuga parviflora</i> Benth. MUH-1777                   | Lamiaceae      | Summer            | Leaf, root, stem, twigs | The plant leaf extract is used for cure of typhoid and malaria. The root decoction is used for cure of chronic fever and chest pains. It is used as vermifuge. It is used as fodder for domestic goats and animals.                                                                                                    |
| 4.    | <i>Allium griffithianum</i> Boiss. MUH-1778               | Amaryllidaceae | Summer            | Leaf                    | The leaf tea or decoction is used to cure fever and cough. It is used as food. It is used as stomach cure and appetizer for easy digestion.                                                                                                                                                                            |
| 5.    | <i>Aconogonon alpinum</i> (All.) Schur MUH-1779           | Polygonaceae   | Summer            | Leaf, root              | Leaves are used as culinary food. Root is used for the treatment of joints pain. The root powder is used as stomach pain reliever and tonic as wormicidal.                                                                                                                                                             |
| 6.    | <i>Actaea spicata</i> L. MUH-1780                         | Ranunculaceae  | Summer            | Root, leaf              | Juice of roots is used to kill lice. The leaf extract is used for curing of nerve infirmities, joints inflammation, leucorrhea and rheumatism.                                                                                                                                                                         |
| 7.    | <i>Aesculus indica</i> (Wall. Ex Cambess.) Hook. MUH-1781 | Spindaceae     | Summer            | Leaf, root, bark        | The leaf decoction is used for cure of skin rashes and irritation. The root powder is used for treatment of rheumatic pains. The bark extract is used for curing of headache. Its leaves are used as fodder. Wood and stem is used as fuel.                                                                            |
| 8.    | <i>Aconitum heterophyllum</i> Wall. Ex Royle MUH-1782     | Ranunculaceae  | Summer            | Root, leaf, stem bark   | Root's tea is used for the treatment of fever, vomiting, dysentery, flu cough and abdominal pain with boiled milk. The root decoction is used as expectorant and febrifuge agent. The bark powder is used for cure of inflammation and chronic joints pains.                                                           |
| 9.    | <i>Abies pindrow</i> Royle. MUH-1783                      | Pinaceae       | Summer            | Leaf, root              | The paste of the leaf is used for curing cuts, wounds and bruises to get rid of bacteria and germs. The root paste is used to cure inflammation of joints. The root tea is used for cure of asthma and cough. Seeds decoction is used for treating fever, hyperglycemia and bronchitis.                                |
| 10.   | <i>Achillea millefolium</i> L. MUH-1784                   | Asteraceae     | Summer            | Leaf, root              | Leaf ash and paste is used for cure bleeding wounds. The leaf decoction is used for dyspepsia and flatulence of stomach. Leaves are chewed to treat teeth pain and gums bleeding. Leaf juice is poured in ear to treat ear pain. Plant root infusion is used to treat T.B., stomach disorder and fever in form of Tea. |
| 11.   | <i>Artemisia japonica</i> Thunb. MUH-1785                 | Asteraceae     | Summer            | Leaf, root, flower      | The juice of leaves is used for cough and asthma. The flower decoction is used for cure of vaginitis. The root infusion is used for treating hypertension. The leaf paste is used for cure of joint pains.                                                                                                             |
| 12.   | <i>Anaphalis triplinervis</i> Clarke MUH-1786             | Asteraceae     | Summer            | Leaf, root and stem     | The leaf paste is used for cure for wounds and pains of toes. The leaf decoction is used in cure of epilepsy. The whole plant paste is used for treating of animal feet diseases as ethnoveterinary medicines.                                                                                                         |
| 13.   | <i>Artemisia macrophylla</i> Fisch. ex Besser MUH-1787    | Asteraceae     | Summer            | Leaf, shoot, root       | Leaves are used for cough and asthma. Shoot is used for fodder. The root decoction is used as relief of edema and diuretic. The leaf cooked as vegetable for cure of constipation. Leaf tea is used as vigour tonic and cure of rheumatic disorders.                                                                   |
| 14.   | <i>Astragalus graveolens</i> Benth. MUH-1788              | Papilionaceae  | Summer            | Leaf, Fruit             | Leaf is used for cure of wounds. Fruit is eatable and used as antioxidant agent.                                                                                                                                                                                                                                       |
| 15.   | <i>Adiantum aethiopicum</i> L. MUH-1790                   | Pteridaceae    | Summer            | Leaf                    | Juice of leaves is used for the treatment of chest burning, stomachache and blood purification.                                                                                                                                                                                                                        |
| 16.   | <i>Arisaema tortuosum</i> (Wall.) Schott MUH-1791         | Araceae        | Summer            | Leaf, root, tuber       | The root decoction is used as wormicide. The extract of leaf is used to cure cattle worms and stomach issues. The dried tubers are used as cure of snake poison.                                                                                                                                                       |
| 17.   | <i>Astragalus chlorostachys</i> Bunge MUH-1792            | Papilionaceae  | Summer            | Leaf                    | The leaf decoction is used as abortifacient and relief of vaginal pains. The plant is used as fodder for the livestock and cattle.                                                                                                                                                                                     |

(Continued)

Table 4. (Continued)

| S. No | Species name                                             | Family         | Collecting Period | Part used                     | Traditional ethnobotanical uses                                                                                                                                                                                                                                                                                      |
|-------|----------------------------------------------------------|----------------|-------------------|-------------------------------|----------------------------------------------------------------------------------------------------------------------------------------------------------------------------------------------------------------------------------------------------------------------------------------------------------------------|
| 18.   | <i>Bergenia locustral</i> (Haw.) Sternb. MUH-1793        | Saxifragaceae  | Summer            | Leaf, root                    | Extract of leaf is used for cure of earaches. The root decoction is used as a tonic in treatment of fevers, diarrhoea and pulmonary affections.                                                                                                                                                                      |
| 19.   | <i>Bromus pectinatus</i> Thunb. MUH-1794                 | Poaceae        | Summer            | Leaf, whole plan              | It is used as fodder with increasing of milk yield in cattle. The plant is also used as fuel agent in dried form.                                                                                                                                                                                                    |
| 20.   | <i>Berberis 10ustra</i> Royle MUH-1795                   | Berberidaceae  | Summer            | Leaf, root                    | Dried leaves powder is used for the treatment of headache, stomachache. The root decoction is used for cure of joints pain and toothache. Boiled water of roots is used to treat internal wounds, especially bone fracture.                                                                                          |
| 21.   | <i>Bistorta amplexicaulis</i> (D.Don) Greene MUH-1796    | Polygonaceae   | Summer            | Root, Leaf                    | Dried root is used as tea to cure stomachache. The herbaceous roots are tonic for enhancing of cow milk. The root decoction is used for cure of toothache. The whole plant is also used as fodder or cattle. Root paste is used as cure of snake poison.                                                             |
| 22.   | <i>Buddleja crispa</i> Benth. MUH-1797                   | Buddlejaceae   | Summer            | Root, leaf                    | The root infusion is used for curing wound healing by increasing platelets. Its leaf extract is used for inflammation and analgesic purpose. It is used as fodder for indigenous pets and cattle.                                                                                                                    |
| 23.   | <i>Buxus wallichiana</i> Baill. MUH-1798                 | Buxaceae       | Summer            | Leaf, root, seed              | Dried leaves are used in the treatment of joints pain and muscles pain. The root decoction is used for cure of syphilis. The seed powder is used as purgative agent.                                                                                                                                                 |
| 24.   | <i>Convolvulus arvensis</i> L. MUH-1799                  | Convolvulaceae | Summer            | Leaf, stem, root              | Leaf is used as vegetable which is purgative and laxative. The stem paste is used for treating of joints pain. It is also used as fodder.                                                                                                                                                                            |
| 25.   | <i>Cirsium arvense</i> (L.) Scop. MUH-1800               | Asteraceae     | Summer            | Leaf, root, stem              | The leaf decoction is used for cure of edema. The root powder is used for cure of hepatic issues. Powdered form mix with water is used as tonic.                                                                                                                                                                     |
| 26.   | <i>Campanula pallida</i> Wall. MUH-1801                  | Campanulaceae  | Summer            | Leaf, stem, root              | The leaf is used to cure bactericidal and fungicidal. The root decoction is used for treating scabies. The leaf and stem is used as fodder.                                                                                                                                                                          |
| 27.   | <i>Cynoglossum lanceolatum</i> Forssk. MUH-1802          | Boraginaceae   | Summer            | Leaf, root                    | The foliar past is applied on abscess to remove pus. It is also use in asthma. The leaf decoction is used for cure of eye ailments. The root infusion is used for cure of chest infection and bronchitis.                                                                                                            |
| 28.   | <i>Cuscuta reflexa</i> Roxb. MUH-1803                    | Convolvulaceae | Summer            | Whole plant, stem             | Juice of the whole plant used to increase the length of hairs and make strong. It is also used as fodder. Its decoction is used in jaundice and cure of spleen disorders. The infusion is used for treating urinary issues. The powder mixed with desi ghee/butter is used for cure of weak muscles and their pains. |
| 29.   | <i>Cedrus deodara</i> (Roxb. Ex D. Don) G.Don MUH-1804   | Pinaceae       | Summer            | Leaf, stem, fruit, root, wood | The leaf decoction is used for treating of piles. The root burnt used to cure epilepsy. The fruit is used for renal infection and fever. The stem bark is used for curing urinary bladder issues. Oil of wood is used for toothache, applied to skin for skin problems. Wood is also used as fuel.                   |
| 30.   | <i>Colchicum luteum</i> Baker MUH-1805                   | Colchicaceae   | Summer            | Leaf, root, stem, flower      | Juice of plant is used for purification of blood. The leaf decoction is used for curing gout and joint pain. The root infusion is used for cure of liver disorders and enlarged spleen.                                                                                                                              |
| 31.   | <i>Corylus colurna</i> L. MUH-1806                       | Butalaceae     | Summer            | Fruit, leaf                   | Fruit is eatable is used as vigour. The leaf extract is used as antioxidant. Leaf extract is useful as cure of snake poison.                                                                                                                                                                                         |
| 32.   | <i>Corydalis vaginans</i> Royle MUH-1807                 | Fumariaceae    | Summer            | Sap, root                     | The sap of the plant is used in the treatment of eye diseases. The root decoction is used to cure epilepsy.                                                                                                                                                                                                          |
| 33.   | <i>Cotoneaster microphyllus</i> Wall. Ex Lindl. MUH-1808 | Rosaceae       | Summer            | Leaf, root, stem              | The leaf decoction is used for treating of diarrhoea. The root powder is used as effective to cure wounds. The leaf and stem is used as fodder for cattle and goats.                                                                                                                                                 |
| 34.   | <i>Corydalis govaniiana</i> Wall. MUH-1809               | Fumariaceae    | Summer            | Leaf                          | The juice of leaf is used for the treatment of fever and skin problem.                                                                                                                                                                                                                                               |
| 35.   | <i>Caltha alba</i> Cambess. MUH-1810                     | Ranunculaceae  | Summer            | Leaf, whole powder            | The dried powder or juice of this plant is used to reduce muscle pain and sedative.                                                                                                                                                                                                                                  |
| 36.   | <i>Cenchrus pennisetiformis</i> Steud. MUH-1811          | Poaceae        | Summer            | Leaf, stem                    | The leaf extract is used for cure of bacterial infections. The stem and leaf parts are used as fodder for cattle and rodents.                                                                                                                                                                                        |
| 37.   | <i>Clinopodium vulgare</i> L. MUH-1812                   | Lamiaceae      | Summer            | Leaf                          | A sweet and aromatic herb tea is made from the fresh leaf for cure of headache and migraine pain.                                                                                                                                                                                                                    |

(Continued)

Table 4. (Continued)

| S. No | Species name                                            | Family         | Collecting Period | Part used                  | Traditional ethnobotanical uses                                                                                                                                                                                                                  |
|-------|---------------------------------------------------------|----------------|-------------------|----------------------------|--------------------------------------------------------------------------------------------------------------------------------------------------------------------------------------------------------------------------------------------------|
| 38.   | <i>Digitaria cruciata</i> (Nees) A. Camus MUH-1813      | Poaceae        | Summer            | Seed, leaf, root           | The seed powder or flour is used as tonic for body vigour. The root decoction is used for curing of stomach disorders. The leaf extract is used as bioherbicide. It is used as fodder for cattle and goats.                                      |
| 39.   | <i>Erysimum hieracifolium</i> L. f. MUH-1814            | Brassicaceae   | Summer            | Leaf, root, whole plant    | The leaf decoction is used for cure of foot rot. The root infusion is used for treatment of pimples and bruises on legs. The whole plant is used as food and source of vegetable.                                                                |
| 40.   | <i>Erysimum hedgeanum</i> Al-Shehbaz MUH-1815           | Brassicaceae   | Summer            | Leaf, whole plant          | This is poisonous herb. The juice of whole plant is use to kill lice in animals.                                                                                                                                                                 |
| 41.   | <i>Euonymus hemsleyanus</i> Loes. MUH-1816              | Celastraceae   | Summer            | Leaf, root, whole plant    | The leaf decoction is used as tonic for hair growth. It is used as fodder cattle and rodents.                                                                                                                                                    |
| 42.   | <i>Elsholtzia strobilifera</i> (Benth.) Benth. MUH-1817 | Lamiaceae      | Summer            | Leaf, root, stem           | The leaf tea is useful for cure of cold and flu. The root infusion is used for treating indigestion, flatulence and diarrhea. The stem bark is used for cure of pharyngitis disorders. The whole plant is used as fodder cattle and rodents.     |
| 43.   | <i>Fragaria nubicola</i> Lacaita MUH-1818               | Rosaceae       | Summer            | Fruit, leaf                | Fruit is eatable and used as antioxidant agent. The leaf decoction is used for curing of blemishes infirmities. The fruit extract with milk is used for damaged and broken nerve disorders. The leaf smoke is used for treating of lungs issues. |
| 44.   | <i>Geranium rotundifolium</i> L. MUH-1819               | Geraniaceae    | Summer            | Root, Leaves               | Dried root powder is dotted on wounds. The dried roots were grinded, sugar and milk are added in it, and then used for pain relief of joints. The root decoction is used to cure epilepsy.                                                       |
| 45.   | <i>Geranium villosum</i> Ten. MUH-1820                  | Geraniaceae    | Summer            | Leaf, bark and whole plant | It is used as food for cure of edema. The leaf and bark paste is used for broken and fractured legs and joints.                                                                                                                                  |
| 46.   | <i>Gerbera gossypina</i> (Royle) Beauverd MUH-1821      | Asteraceae     | Summer            | Leaf, root, stem           | The leaf decoction is used cure of hair disorders. The root powder is used for treating the rashes and foot allergy. It is used as fodder cattle and rodents.                                                                                    |
| 47.   | <i>Hylotelephium ewersii</i> (Ledeb.) H. Ohba MUH-1822  | Crassulaceae   | Summer            | Leaf                       | It is believed to be having cooling effect if the juice of the leaves mix with water and drink.                                                                                                                                                  |
| 48.   | <i>Ilex dipryrena</i> Wall. MUH-1823                    | Aquifoliaceae  | Summer            | Leaf, stem                 | It is used as fodder. It is also the source of fuel and wood.                                                                                                                                                                                    |
| 49.   | <i>Indigofera heterantha</i> Brandis MUH-1824           | Papilionaceae  | Summer            | Leaf, Shoot                | The leaf decoction is used for cure of stomach disorder and abdominal pains. Shoots are used as fodder, branches as ropes, brooms and fuel.                                                                                                      |
| 50.   | <i>Isodon rugosus</i> (Wall.) Codd MUH-1825             | Lamiaceae      | Summer            | Leaf, root                 | Juice of the leaves is used for stomachache. The root decoction is used for respiratory and cardiovascular problems.                                                                                                                             |
| 51.   | <i>Juncus arcuatus</i> Wahlenb. MUH-1826                | Juncaceae      | Summer            | Whole plant                | It is used as fodder cattle and rodents. It is used as fuel in dried form.                                                                                                                                                                       |
| 52.   | <i>Juniperus communis</i> Brand. MUH-1827               | Cupressaceae   | Summer            | Wood, leaf, root           | The decoction of root is used for cure of inflammation and diarrhea. The leaf extract is used as microbicide and antiseptic. It is the source of fuel and commercial wood.                                                                       |
| 53.   | <i>Lespedeza juncea</i> (L.f.) Pers. MUH-1828           | Papilionaceae  | Summer            | Leaf, root                 | The decoction of root is used as cure of diarrhea and dysentery. The leaf tea is used for stomach pains. It is used as fodder cattle and rodents.                                                                                                |
| 54.   | <i>Ligularia thomsonii</i> Clarke. MUH-1829             | Asteraceae     | Summer            | Root, leaf                 | Dried root or powdered of root is used in the treatment of asthma. The leaf infusion and salad is stimulator of blood flow, reduce inflammation and stopping cough.                                                                              |
| 55.   | <i>Mentha longifolia</i> L. MUH-1830                    | Lamiaceae      | Summer            | Leaf, shoot.               | Shoot extract is used for stomachache and gas trouble. Juice of leaves expels worms from the stomach. It is also as condiment. The root decoction is used to cure cardiovascular disorders.                                                      |
| 56.   | <i>Matricaria chamomilla</i> L. MUH-1831                | Asteraceae     | Summer            | Root, leaf, stem bark      | Root powder is used for toothache. The leaf decoction is used in relief of fever and inflammation. The bark is used for cure of menstrual cycle regulator.                                                                                       |
| 57.   | <i>Morina persica</i> L. MUH-1832                       | Caprifoliaceae | Summer            | Aerial parts               | It is used for treatment of cold. Its leaf extract is used as bactericidal and fungicidal herbal medicine.                                                                                                                                       |
| 58.   | <i>Meliosma simplicifolia</i> (Roxb.) Walp. MUH-1833    | Sabiaceae      | Summer            | Leaf, Wood                 | Leaf decoction is used as cure of inflammation reducer of legs and broken joints. The leaf is used as fodder. Its wood is source of fuel.                                                                                                        |

(Continued)



Table 4. (Continued)

| S. No | Species name                                                 | Family         | Collecting Period | Part used                           | Traditional ethnobotanical uses                                                                                                                                                                                                                                                                                                               |
|-------|--------------------------------------------------------------|----------------|-------------------|-------------------------------------|-----------------------------------------------------------------------------------------------------------------------------------------------------------------------------------------------------------------------------------------------------------------------------------------------------------------------------------------------|
| 59.   | <i>Oxalis corniculata</i> L. MUH-1834                        | Oxalidaceae    | Summer            | Leaf, Flowers                       | Juice of leaves and flowers mixed together is used for the treatment of eyes.                                                                                                                                                                                                                                                                 |
| 60.   | <i>Onychium japonicum</i> (Thunb.) Kunze MUH-1835            | Pteridaceae    | Summer            | Leaf, root                          | Leaf is used as vegetable for laxative purpose. Dried root or powdered root is used for the treatment of asthma and flu.                                                                                                                                                                                                                      |
| 61.   | <i>Oxyria digyna</i> (L.) Hill MUH-1836                      | Polygonaceae   | Summer            | Shoot, root, leaf                   | Shoot extracts are used for constipation, liver disorders and stomachache. Root decoction is used for cure of stomachache.                                                                                                                                                                                                                    |
| 62.   | <i>Onosma bracteata</i> Wall. MUH-1837                       | Boraginaceae   | Summer            | Root, leaf                          | Powder of dry root is used against asthma and bronchitis. Decoction of leaf is given in stomach and bladder irritation.                                                                                                                                                                                                                       |
| 63.   | <i>Origanum vulgare</i> L. MUH-1838                          | Lamiaceae      | Summer            | Leaf, root                          | The leaf poultice is used for muscles pain and broken bones. The root tea is used for cold cure and toothache. It is also as vegetable and fodder.                                                                                                                                                                                            |
| 64.   | <i>Polygala chinensis</i> L. MUH-1839                        | Polygalaceae   | Summer            | Leaf, root, stem                    | This root powder plant is used for treatment of snake bites. The leaf extract is used as fever cure and expectorant for cough and bronchitis. The leaf extract is also used to cure cardiovascular disorders.                                                                                                                                 |
| 65.   | <i>Phlomis bracteosa</i> Royle ex Benth. MUH-1840            | Lamiaceae      | Summer            | Leaf, Flower                        | Leaf powder is mixed in tea and used against cough and cold. Flowers are crushed and used against toothache.                                                                                                                                                                                                                                  |
| 66.   | <i>Pedicularis brevifolia</i> D.Don MUH-1841                 | Orobanchaceae  | Summer            | Leaf, Root                          | Leaf decoction is used for the treatment of cough, fever and asthma. The leaf poultice is used for allergy and skin disease. Dried or powdered root is used for the treatment of stomachache.                                                                                                                                                 |
| 67.   | <i>Primula lacustris</i> Sm. MUH-1842                        | Primulaceae    | Summer            | Stem, leaf                          | Juice of stem is used for eye diseases. Leaf extract is used for cure of scabies.                                                                                                                                                                                                                                                             |
| 68.   | <i>Podophyllum hexandrum</i> Royle MUH-1843                  | Barberidaceae  | Summer            | Leaf, root                          | Leaf powder is used in the treatment of asthma. Root is used to reduce goiter and other sore throat infections.                                                                                                                                                                                                                               |
| 69.   | <i>Populus alba</i> L. MUH-1844                              | Salicaceae     | Summer            | Leaf, root, bark                    | The leaf decoction is used to cure gout, joint pain and arthritis. The root infusion is used for backbone and lumber pains. The stem bark is used as cure of liver inflammation and debility issues. Leaf are used as fodder. Wood is used as fuel.                                                                                           |
| 70.   | <i>Plantago lanceolata</i> L. MUH-1845                       | Plantaginaceae | Summer            | Leaf, root, stem bark               | The leaf decoction is used as laxative. The root tea is used for cure of cold, flu and fever. The bark extract is employed is used for cure of debility and body general weakness.                                                                                                                                                            |
| 71.   | <i>Persicaria mitis</i> (Schrank) Holub MUH-1846             | Polygonaceae   | Summer            | Root, leaf                          | Tea is made by root which help to reduce the joints pain. Leaf is used for cure of stomach pains.                                                                                                                                                                                                                                             |
| 72.   | <i>Picea smithiana</i> (Wall.) Boiss. MUH-1847               | Pinaceae       | Summer            | Leaf, root, wood                    | The leaf extract is used for cure of wounds and chilling pains. The root decoction is used for treating the stomachache. Wood is the source of fuel.                                                                                                                                                                                          |
| 73.   | <i>Podophyllum emodi</i> Wall. Ex Hook.f. & Thomson MUH-1848 | Berberidaceae  | Summer            | Leaf, root, stem bark               | The leaf decoction is used to cure constipation and burning sensation. The root tea is used to cure colds, fever and cough. The bark powder is used for cure of wounds. It is used as fodder cattle and rodents.                                                                                                                              |
| 74.   | <i>Pinus wallichiana</i> A.B.Jacks. MUH-1849                 | Pinaceae       | Summer            | Leaf, stem bark, root, resin, seeds | The smell of resin reduce severe cough. Leaf decoction is used cure heat of stomach and chest infection. The infusion of bark is used for cure of dysentery. Wood is used to make house thatching and source of fuel as well. Cones are used for fuel purposes and seeds are edible as nuts. The resin is used to make coal for paving roads. |
| 75.   | <i>Pinus roxburghii</i> Sarg. MUH-1850                       | Pinaceae       | Summer            | Resin, leaf, bark and flower cone   | The extract of leaf is used to kill worms and used as septic agent. The infusion of bark is used for dysentery and heat or burning sensation of feet. Wood is used for furniture and fire purpose. Smoke is used to repel the mosquitoes and other insects. Flower extract is also used to cure cardiovascular disorders.                     |
| 76.   | <i>Rosa macrophylla</i> Lindl. MUH-1851                      | Rosaceae       | Summer            | Fruit, root, flower                 | Fruit is used in fever to cure from it. The root powder is used for cure of burnt wounds. The flower is used to make admixture of flower with sugar and is used for cure of body tonic.                                                                                                                                                       |
| 77.   | <i>Rheum emodi</i> Wall. MUH-1852                            | Polygonaceae   | Summer            | Leaf, root, stem bark               | The leaf extract is used as laxative and urination. The root infusion is used for cure of fever and cough. The stem bark decoction is used for treating of menstrual or other sexual disorders.                                                                                                                                               |

(Continued)

Table 4. (Continued)

| S. No | Species name                                                        | Family          | Collecting Period | Part used                | Traditional ethnobotanical uses                                                                                                                                                                                                                                                       |
|-------|---------------------------------------------------------------------|-----------------|-------------------|--------------------------|---------------------------------------------------------------------------------------------------------------------------------------------------------------------------------------------------------------------------------------------------------------------------------------|
| 78.   | <i>Rubus niveus</i> subsp. <i>Horsfieldii</i> (Miq.) Focke MUH-1853 | Rosaceae        | Summer            | Fruit, root and leaf     | Fruit is eatable and used as tonic of body. The leaf decoction is used for cure of debility and menstrual disorders. The root extract is used to treat eye problems.                                                                                                                  |
| 79.   | <i>Rheum lacustral</i> D. Don MUH-1854                              | Polygonaceae    | Summer            | Root, Leaf               | Leaf decoction is used to cure stomachache and it is cooked as vegetable which is laxative and used to cure constipation. Paste of root is used for wound healing.                                                                                                                    |
| 80.   | <i>Rhus succedanea</i> L. MUH-1855                                  | Anacardiaceae   | Summer            | Leaf, root, stem         | The root extract is used as antidote for scorpion sting. The root infusion is applied for as febrifuge and antivenous. The stem bark is used for cure of ophthalmic disorders. It is used as fodder. It is also source of fuel. Stem bark decoction is used to cure kidney disorders. |
| 81.   | <i>Saussurea lappa</i> (Decne.) Sch.Bip. MUH-1856                   | Asteraceae      | Summer            | Root, leaf               | Powder of root is used for cough and toothache. The extract of root is used as vermifuge for intestinal worm. Juice of root is used to cure rheumatism and pneumonia. Its root is used for cure of tuberculosis and epilepsy.                                                         |
| 82.   | <i>Silene vulgaris</i> Garcke. MUH-1857                             | Caryophyllaceae | Summer            | Leaf, whole plant        | It is used as vegetable laxative. The plant has many nutritive worth. It is also used for fodder for rodents in local area.                                                                                                                                                           |
| 83.   | <i>Sonchus asper</i> Hill. MUH-1858                                 | Asteraceae      | Summer            | Leaf and whole plant     | Its leaf decoction is used for cure of bleedings. It is known as best antioxidant for cure of different infirmities. Fresh leaves and stem is cooked as vegetable. It is used as fodder as well.                                                                                      |
| 84.   | <i>Sorghum halepense</i> Pers. MUH-1859                             | Poaceae         | Summer            | Seed, leaf, stem, root   | Seed flour is used as body tonic. Juice of root is used for the asthma. Leaf decoction is used for urinary irritation. It is also used for fodder.                                                                                                                                    |
| 85.   | <i>Senecio chrysanthemoides</i> DC. MUH-1860                        | Asteraceae      | Summer            | Leaf, root, whole plant  | Leaf decoction is used for cure of rashes and bruises. Root paste is used for scorpion sting antidote. It is used as vegetable.                                                                                                                                                       |
| 86.   | <i>Skimmia laureola</i> Franch. MUH-1861                            | Rutaceae        | Summer            | Leaf, root, stem wood    | Tea is made by dry leaves which is very effective in joints pain, muscles pain, stomach pain and bone pain. Powdered root also used in deserts.                                                                                                                                       |
| 87.   | <i>Salix tetrasperma</i> Roxb. MUH-1862                             | Salicaceae      | Summer            | Leaf, shoot, whole plant | Leaf infusion is used as bactericidal. It is used antidiabetic tonic. It is used as fodder. Wood is used as fuel. Shoot extract is also used to cure cardiovascular disorders.                                                                                                        |
| 88.   | <i>Symplocos paniculata</i> (Thunb.) Miq. MUH-1863                  | Symplocaceae    | Summer            | Leaf, root               | Powdered leaf is used with cow milk is used for treatment of menorrhagia. The leaf extract is applied on eye disease like irritation. Its root decoction is used for cure of dysentery.                                                                                               |
| 89.   | <i>Sarcococca saligna</i> Müll.Arg. MUH-1864                        | Buxaceae        | Summer            | Leaf, root               | Tea of leaf is used in constipation, blood purification and muscles relaxation. The root powder with hot milk or water is used as laxative. The root decoction is used for cure of muscular pains and blood cleanser in the study area.                                               |
| 90.   | <i>Satyrium nepalense</i> D.Don MUH-1865                            | Orchidaceae     | Summer            | Tuber, leaf              | Tubers are used as tonic and to cure dysentery and malaria fever. The leaf and tuber tea is used for cure of backbone pain. Its decoction is used for curing nephritis and kidney disorders. The leaf paste is used for cure of erectile dysfunction.                                 |
| 91.   | <i>Scutellaria linearis</i> Benth. MUH-1866                         | Lamiaceae       | Summer            | Leaf, root               | Leaf powder is used to reduce inflammation and diarrhea. The root decoction is used for treatment of analgesic problems. The plant is used for antinociceptive agent in different drug preparation. It is neuro-stimulus booster.                                                     |
| 92.   | <i>Swertia paniculata</i> Wall. MUH-1867                            | Gentianaceae    | Summer            | Leaf, root               | Leaf extract is used to cure hepatic disorders. The root decoction is used to treat diabetes. Powdered plant is used to cure from fever.                                                                                                                                              |
| 93.   | <i>Solidago lacustralis</i> Fisch. Ex Herder MUH-1868               | Asteraceae      | Summer            | Leaf, shoot, root        | Leaf paste is used to cure of burns. Root powdered plant is used to heal wounds and cure of pus and pain. It is used as cure of edema by release of excessive water. Root decoction is used to cure kidney stones.                                                                    |
| 94.   | <i>Thymus linearis</i> Benth. MUH-1869                              | Lamiaceae       | Summer            | Leaf, root, whole plant  | Tea is made by this plant which help to reduce fats in body, abdominal pain and gas trouble.                                                                                                                                                                                          |
| 95.   | <i>Taxus baccata</i> L. MUH-1870                                    | Taxaceae        | Summer            | Leaf, root, wood         | The leaf extract is used to treat cold and fever. The root powder is used for treatment of cough and chest pains. It is also used for preparation of taxol medicines. The plant is used for source of fuel.                                                                           |

(Continued)

Table 4. (Continued)

| S. No | Species name                                | Family         | Collecting Period | Part used              | Traditional ethnobotanical uses                                                                                                                                                                                                                                                                                                                                                     |
|-------|---------------------------------------------|----------------|-------------------|------------------------|-------------------------------------------------------------------------------------------------------------------------------------------------------------------------------------------------------------------------------------------------------------------------------------------------------------------------------------------------------------------------------------|
| 96.   | <i>Trifolium repens</i> L. MUH-1871         | Papilionaceae  | Summer            | Leaf, root, stem       | Leaf extract is used to cure eye diseases. The root decoction is used to treat col and fevers. The stem bark is used to cure leucorrhoea. This whole plant is used as vegetable                                                                                                                                                                                                     |
| 97.   | <i>Viola biflora</i> L. MUH-1872            | Violaceae      | Summer            | Leaf, flower           | Leaf tea is used to cure flu and colds. The decoction is used for chest infections and cure of soar throat. Flower tea helps in cough headache and flu.                                                                                                                                                                                                                             |
| 98.   | <i>Vicia sativa</i> L. MUH-1873             | Papilionaceae  | Summer            | Leaf, seed             | Leaf is cooked and used vegetable. The leaf decoction is used to treat Parkinson disease. Seeds infusion is used as cure depressant and hypertension.                                                                                                                                                                                                                               |
| 99.   | <i>Viburnum cotinifolium</i> Don. MUH-1874  | Caprifoliaceae | Summer            | Fruit, leaf, root      | Fruit is eatable and used as blood purifier. Leaf extract is known for cure of menorrhagia. The bark is used to muscular pains and cramps. The root tea or infusion is used as laxative to cure constipation.                                                                                                                                                                       |
| 100.  | <i>Viscum album</i> L. MUH-1875             | Viscaceae      | Summer            | Leaf, seed, root, bark | Leaf extract is used in the treatment of cough and asthma. Root powder is used to cure nervousness and fatigue issues. The seed roasted and taken with milk to cure insomnia and lesser immunity. The bark of stem is used to cure panic attacks and mental agitation. The root decoction is used to cure cancer and joint pains. The tea of leaf is used for cure of hypertension. |
| 101.  | <i>Viola canescens</i> Wall. MUH-1877       | Violaceae      | Summer            | Leaf, root, flower     | Leaf powder is used for cure of cough and flow. Tea of flowers is given internally in the treatment of coughs and asthma. The flower decoction is also used in cure of cancer disease. The tea of viola is useful in cure of malaria and immunity development.                                                                                                                      |
| 102.  | <i>Wulfenia amherstiana</i> Benth. MUH-1878 | Plantaginaceae | Summer            | Whole plant, root      | Root decoction us used to cure kidney disorders. It is used as fodder cattle and rodents.                                                                                                                                                                                                                                                                                           |
| 103.  | <i>Withania coolgulans</i> L. MUH-1879      | Solanaceae     | Spring            | Leaf, seed             | The leaf decoction is used to cure fatigue, disability. The seed powder is used for cure of insomnia. The seeds in fat/desi ghee is used for body impotence and nervous activeness.                                                                                                                                                                                                 |

<https://doi.org/10.1371/journal.pone.0255010.t004>

different ailments or these are easy to collect and cheap. So, indigenous population prefer to use this recipe form using different modes of recipe preparation i.e. decoction, powder, infusion, extract, paste etc. These findings (single-use recipes of each plant) were strongly correlated with Uniyal medicinal practices in Kangra district of Himachal Pradesh, Western Himalaya [32].

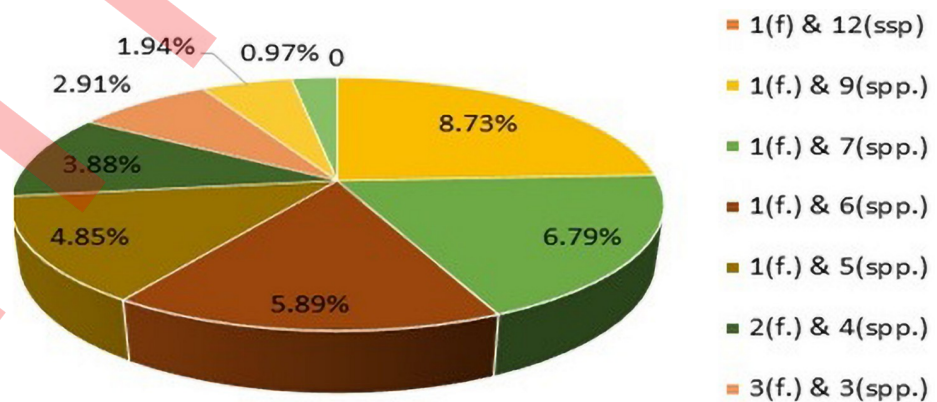

Fig 2. Species distribution pattern of each family from Dawarian and Ratti Gali area of Neelam valley of Azad Jammu and Kashmir, Pakistan.

<https://doi.org/10.1371/journal.pone.0255010.g002>

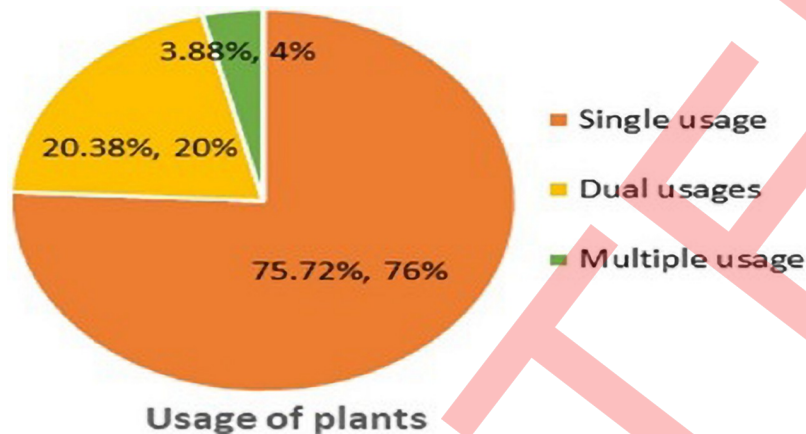

Fig 3. Graphical presentation of plants on the basis of their usage from study area of Dawarian and Rati Gali, District Neelam of Azad Jammu and Kashmir, Pakistan.

<https://doi.org/10.1371/journal.pone.0255010.g003>

### Dual-usage plants

The plants that are used for two key purposes are called dual-usage plants. For example, *Artemisia macrophylla* is used for medicinal as well as fodder. Out of 103 plants species, 21 (20.38%) were representing dual-usage plants. There were six categories of dual-usage of plants representing 21 species, i.e. medicinal & food and fodder & fuel were 7 (33.33%) while medicinal & fodder and food & fodder were 3 (14.28%) and 2 (9.52%), respectively. Medicinal & condiments and medicinal & fuel were 1 (4.76%). A pie-chart of all dual-usage plants is given in (Fig 5). Many researchers positively correlate with our findings as Polat and his co-researchers

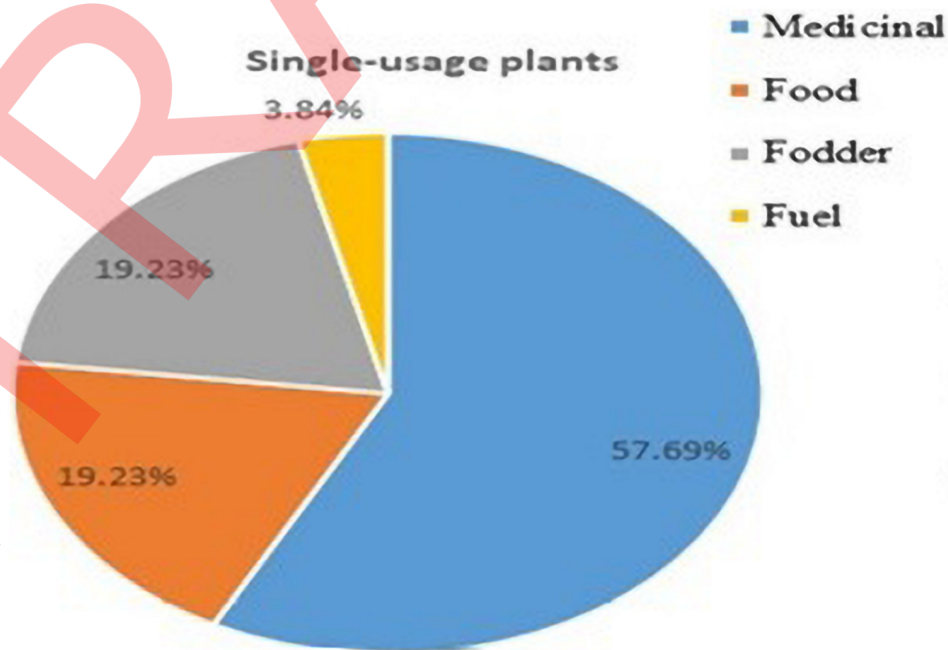

Fig 4. A pie-chart of single-usage on the basis of their usage from study area of Dawarian and Rati Gali, District Neelam of Azad Jammu and Kashmir, Pakistan.

<https://doi.org/10.1371/journal.pone.0255010.g004>



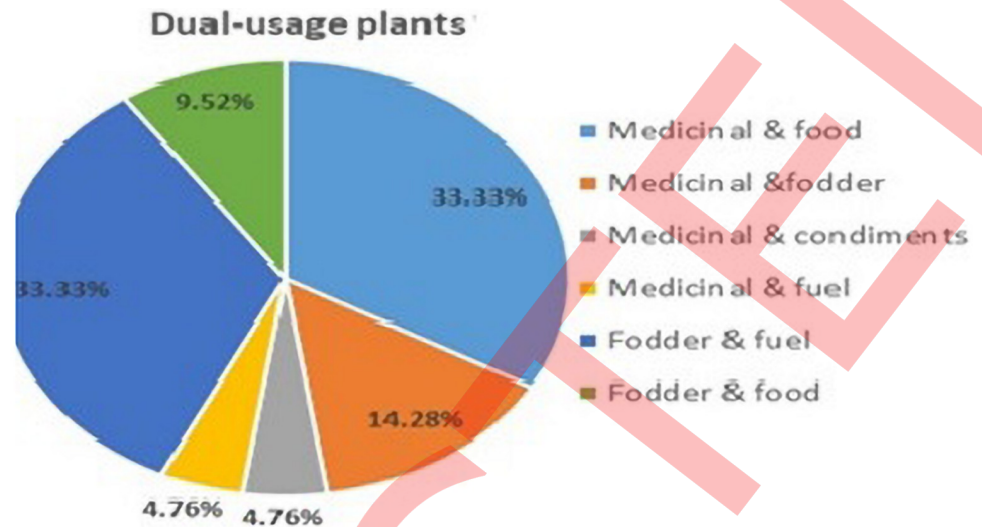

Fig 5. A pie-chart of dual usage plants the basis of their usage from study area of Dawarian and Rati Gali, District Neelam of Azad Jammu and Kashmir, Pakistan.

<https://doi.org/10.1371/journal.pone.0255010.g005>

discussed an ethnobotanical use of medicinal plants in Espiye and its surroundings in 2015 which had dual uses in many areas of research [33].

### Multiple-usage plants

The plants which are used for multiple purposes are called multiple-usage, e.g. *Pinus wallichiana* Jacks. Is used for fuel, furniture, medicinal and thatching. Out of 103 plant species, four were representing multi-usage plants category. There were three categories of multi-usage plants representing four plant species. Out of four plants, fodder, ropes and fuel were 1(25%), medicinal, furniture, fuel and thatching were 2(50%) while Medicinal, food and fodder were 1 (25%). A list of all the multiple-usage plants, their local names and families is given in (Table 6). While a pie-chart of all multiple-usage plants is given in (Fig 6). Similar multiple Traditional use of medicinal plants among Kalasha, Ismaeli and Sunni groups in Chitral District, Khyber Pakhtunkhwa province Pakistan were documented in year 2016. These multiple uses of any plant proves that the plants have very high medicinal and domestic value in life of indigenous communities. It also proves that these plants are facing severe biotic threats being exploited by the local and national markets for domestic and commercial purposes [31–35].

One similar research was conducted on the plants of Darguti area of Tehsil Khuiratta where plants multiple uses being employed by the local population of AJK (Pakistan) while similar type of research works have also been cited in other parts of world where it is proved that high number of plants possess very significant worth from this district which falls in subtropical region [16,36–40] while the reported study area occurs in temperate region [41,42], hence only few plants species were used in multiple use form that may be rich diversity of plants present in the area and people have enough choice to use various available to cope their life necessities.

The medicinal dosage forms preferably used by the study area people include: infusion, juice, powder, paste, extract, tea, decoction and oil for the treatment of different diseases. It is concluded that decoction is the very common form of dosage (20%), followed by powder (17%), extract (14%), tea (13%), paste (9%), juice (7%), chewing (4%) and oil (3%) is least used form (Fig 7) being used by the indigenous communities. It is due to easy preparation of powder or pills from plants parts which have long shelf life and easy to eat or engulf. The other



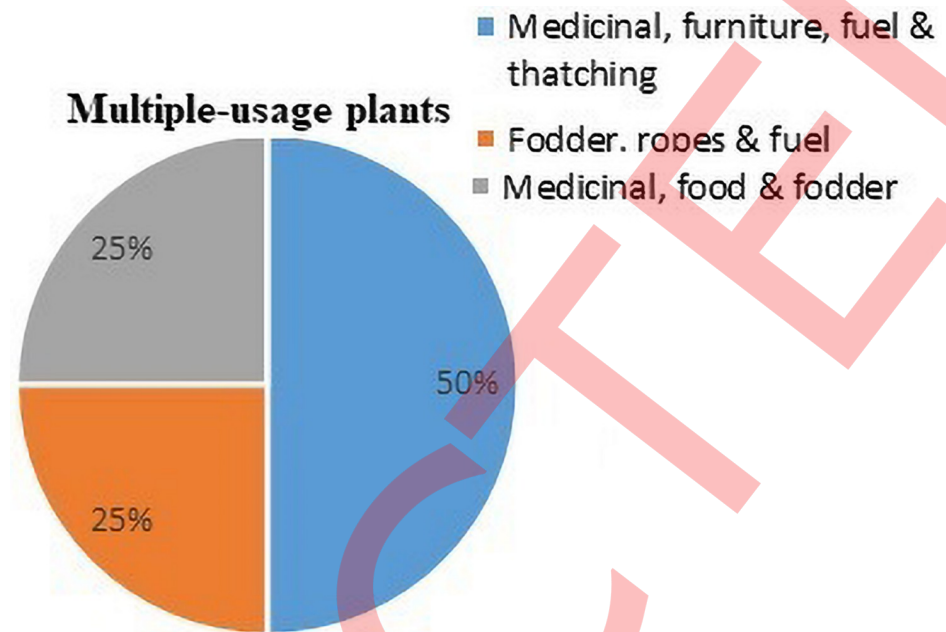

**Fig 6. A pie chart of multiple-usage plants the basis of their usage from study area of Dawarian and Rati Gali, District Neelam of Azad Jammu and Kashmir, Pakistan.**

<https://doi.org/10.1371/journal.pone.0255010.g006>

form decoction and extract are popular in use because they have high efficacy for cure of different infirmities in the local areas of AJK and Pakistan. Similar results have been reported in the past research workers that decoction, powder and extract are prevalent form of recipe use-form in different areas of world [24,26].

For ethnobotanical (EB) purpose-uses of wild indigenous plants (WIPs) are fodder, food, fuel, hedging, thatching, shadow, shelter and construction were used by local people. Among these EB uses highest percentage (37%) is used as fodder, food (32%), fuel 17%, furniture and construction (6%) each. Similar studies were conducted on the plants of Kel village of Neelum Valley, Azad Jammu and Kashmir. They investigated 50 plants belonging to 33 families from the study area where plants have been used in form of food, fodder, shelter, forage and fuel [24,26–28]. The most common part of plant being used for ethnomedicines or EB uses was leaf (18%), followed by seed (17%), root (13%), shoot and bud (9%) each, tuber (7%), bark (6%), sap (5%), and resin is 4% (Fig 8). The highest percentage of leaf used in ethnomedicines or in ethnobotanical uses because these have high conc. of phytoconstituents because of its active photosynthesis machinery process. These are also regenerated as new leaf shape due to primary and secondary growth phenomena. Seeds are easy to collect, long storage time and their accessible availability around the year make them 2<sup>nd</sup> higher use part of plant (Fig 9). Similar reasons and reports have been cited in the previous research works [27,34].

### Statistical analysis

In the study different quantitative ethnobotanical analysis tools were applied to verify the authenticity of data collected from indigenous people. One commonly used tool is fidelity level (FL) which was employed on the data which depicted that *Allium griffithianum* (Jungli pyaz) and *Fragaria nubicola* (Mehwa) are leading species with 75% use-value which is frequently used by local people of Dawarian for treatment of cure of fever & cough and broken nerve

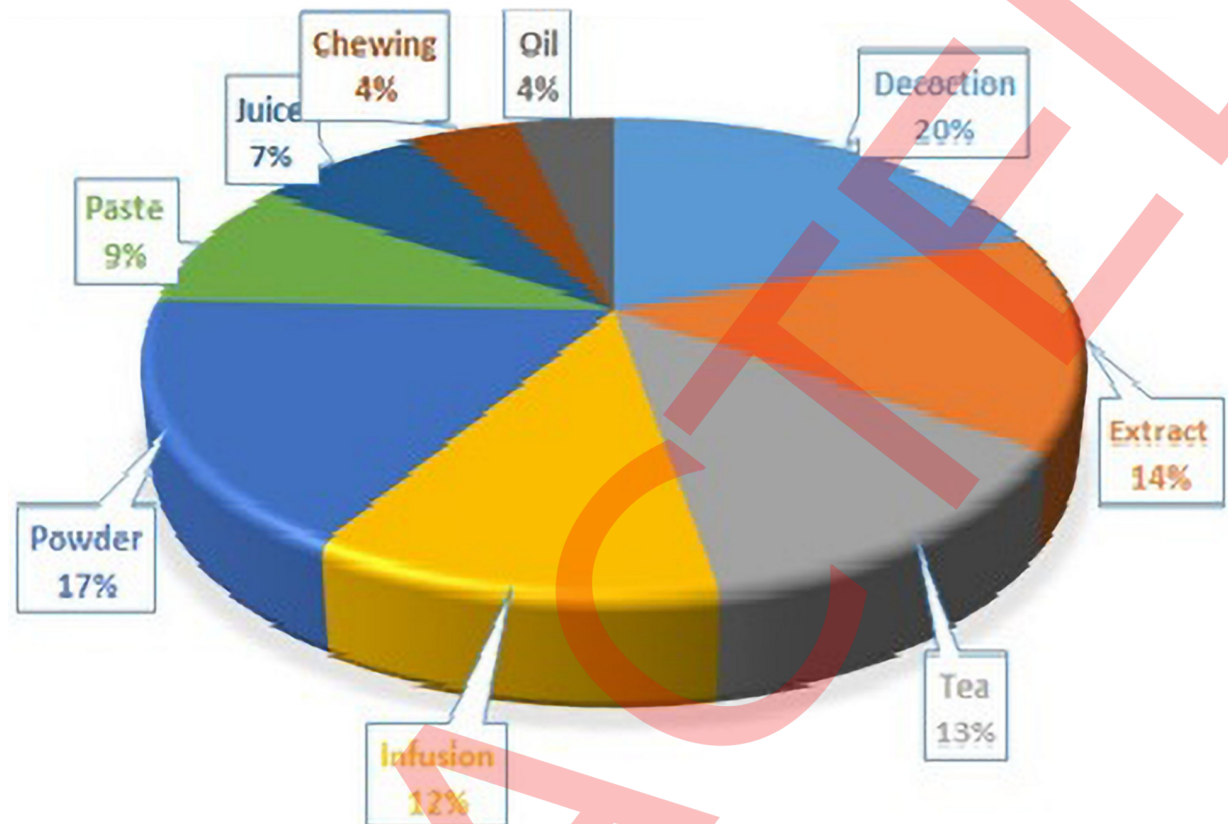

**Fig 7. Depicting recipe forms used for the treatment of different diseases in study area of Dawarian and Rati Gali of District Neelam of Azad Jammu and Kashmir.**

<https://doi.org/10.1371/journal.pone.0255010.g007>

disorders, respectively. Second highest FL 72% for *Mentha longifolia* (Pahari podina) which is used for stomachache, flatulence and condiments. The leaf paste of *Abies pindrow* (Partel) is applied on cuts and wounds bruises to get rid of bacteria and germs. Its wood is also the source of fuel. The results of research are coincident with work of Ahmad and his colleagues who conducted similar studies on the plants of Kel village, Neelum Valley, Azad Jammu and Kashmir [24]. They described that highest FL (95%) was for *Berberis lyceum* being utilized in jaundice, hepatitis, typhoid, fever and tuberculosis issues. In that it was found that *Dioscorea bulbifera*, *Impatiens glandulifera* (90%) were utilized in stiffness, joint torment and *Artemisia vulgaris* (90%) was utilized in liver issues. Additionally, FL level was likewise applied by Farooq in an exploration bunch where similar findings were determined [26]. In our research work, five plant species including *Berberis lyceum* (FL = 97.78%), *Isodon rugosus* (FL = 95.71%), *Saussurea lappa* (FL = 94.74%), *Aconitum heterophyllum* (FL = 92.71%) and *Taxus baccata* (91.58%) had shown very good fidelity level which confirmed that these plants have high medicinal worth in study area (Table 5). Many of these like *Saussurea lappa*, *Aconitum heterophyllum* and *Taxus baccata* are collected from wild and sold on commercial scale to local and national markets for drug development. *Taxus baccata* is used for production of cancer and tumor treatment disease. Similar findings have been reported in other parts of AJK and Pakistan in various ethnobotanical research works indicating that local people of rural and mountains areas still rely on plant for different needs of life [43–48].

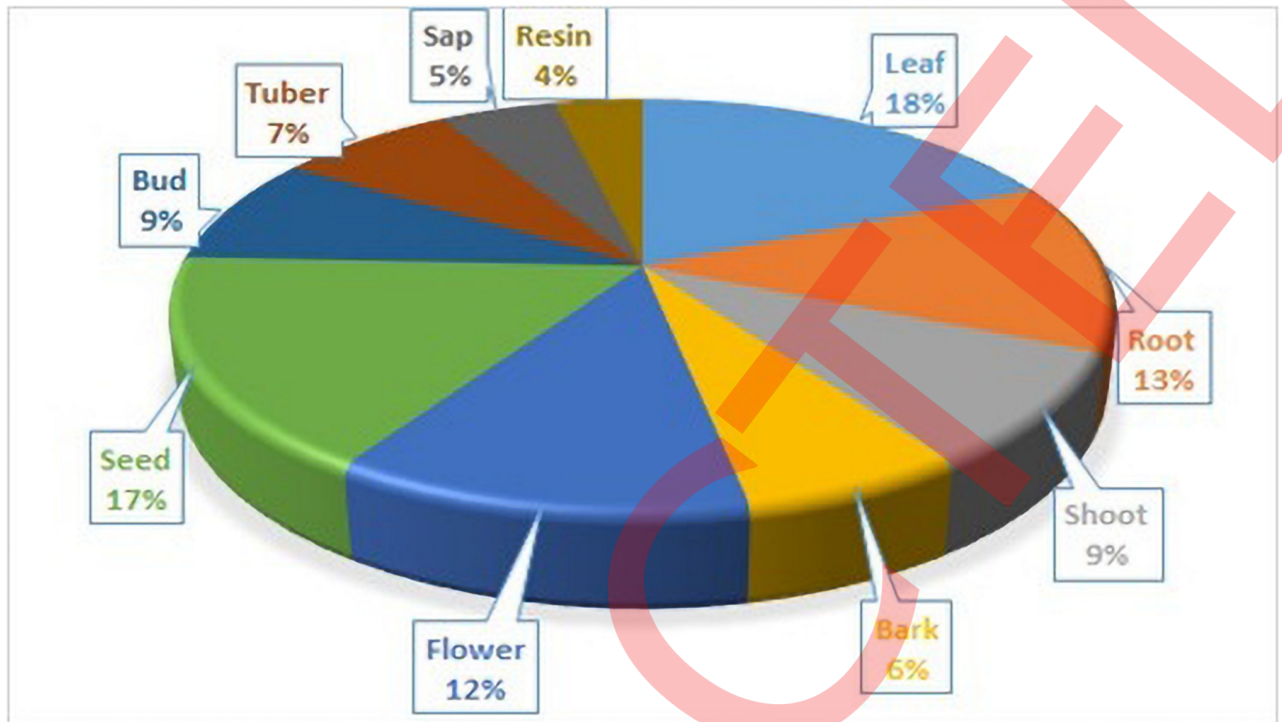

**Fig 8.** Different parts of plants used for the treatment of different diseases in study area of Dawarian and Rati Gali of District Neelam of Azad Jammu and Kashmir.

<https://doi.org/10.1371/journal.pone.0255010.g008>

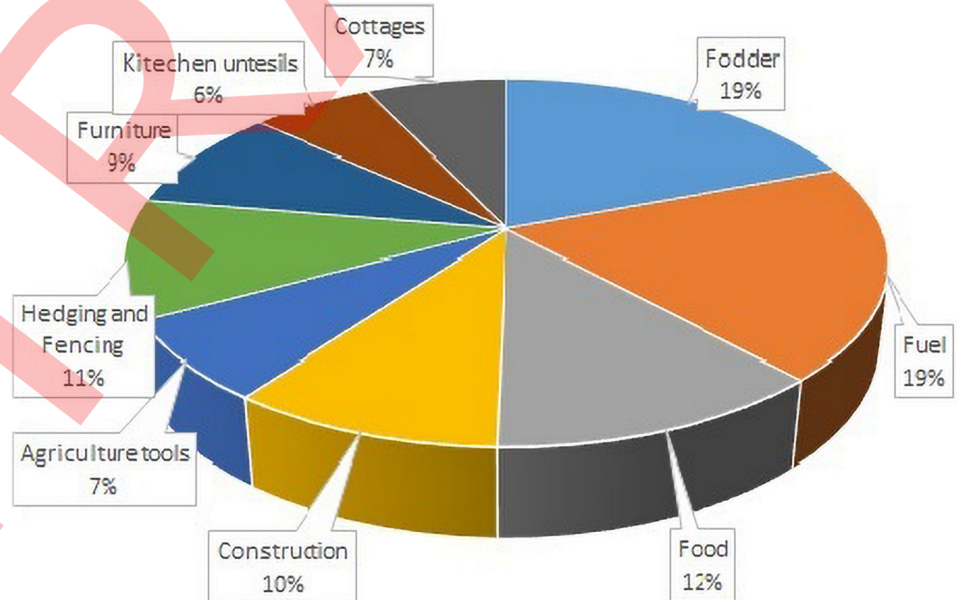

**Fig 9.** Different ethnobotanical uses of plants used by local people in different categories in study area of Dawarian and Rati Gali of District Neelam of Azad Jammu and Kashmir.

<https://doi.org/10.1371/journal.pone.0255010.g009>

Table 5. Fidelity level of plants in study area of two villages Dawarian and Ratti Gali of AJK, Pakistan.

| Sr.No | Species name                  | Local name        | NP | N  | FL    |
|-------|-------------------------------|-------------------|----|----|-------|
| 1.    | <i>Acer cappadocicum</i>      | Tra kanna         | 45 | 70 | 64.29 |
| 2.    | <i>Ajua bracteosa</i>         | Jan-e-Adam        | 56 | 85 | 65.88 |
| 3.    | <i>Ajuga parviflora</i>       | Chita chaou       | 51 | 74 | 68.92 |
| 4.    | <i>Allium griffithianum</i>   | Jungli pyaz       | 32 | 55 | 58.18 |
| 5.    | <i>Aconogonon alpinum</i>     | Chikro            | 57 | 90 | 63.33 |
| 6.    | <i>Actaea spicata</i>         | Moneeri           | 66 | 87 | 75.86 |
| 7.    | <i>Aconitum heterophyllum</i> | Ptrees            | 89 | 96 | 92.71 |
| 8.    | <i>Abies pindrow</i>          | Partal            | 45 | 60 | 75.00 |
| 9.    | <i>Artemisia macrophylla</i>  | Chita chaou       | 23 | 45 | 51.11 |
| 10.   | <i>Astragalus graveolens</i>  | Ban phali         | 45 | 75 | 60.00 |
| 11.   | <i>Adiantum aethiopicum</i>   | Kahkawa           | 21 | 35 | 60.00 |
| 12.   | <i>Berberis lycium</i>        | Sumbal            | 88 | 90 | 97.78 |
| 13.   | <i>Fragaria nubicola</i>      | Mehwa             | 45 | 55 | 81.82 |
| 14.   | <i>Isodon rugosus</i>         | Pemar             | 67 | 70 | 95.71 |
| 15.   | <i>Mentha longifolia</i>      | Pahari podina     | 66 | 75 | 88.00 |
| 16.   | <i>Plantago lanceolata</i>    | Kala chamchi part | 71 | 79 | 89.87 |
| 17.   | <i>Rosa macrophylla</i>       | Shigari           | 44 | 75 | 58.67 |
| 18.   | <i>Saussurea lappa</i>        | Kuth              | 90 | 95 | 94.74 |
| 19.   | <i>Silene vulgaris</i>        | Murkun            | 35 | 45 | 77.78 |
| 20.   | <i>Sonchus asper</i>          | Dhodol            | 44 | 50 | 88.00 |
| 21.   | <i>Thymus linearis</i>        | Ban jamani        | 72 | 85 | 84.71 |
| 22.   | <i>Taxus baccata</i>          | Thuni             | 87 | 95 | 91.58 |
| 23.   | <i>Trifolium repens</i>       | Sinja             | 55 | 70 | 78.57 |
| 24.   | <i>Viola biflora</i>          | Phul naqsh        | 78 | 90 | 86.67 |
| 25.   | <i>Vicia sativa</i>           | Chiri pancha      | 54 | 75 | 72.00 |
| 26.   | <i>Viburnum cotinifolium</i>  | Ukloo             | 58 | 70 | 82.86 |
| 27.   | <i>Viscum album</i>           | Purokh            | 68 | 80 | 85.00 |
| 28.   | <i>Valeriana jatamansi</i>    | Panchi hola       | 61 | 85 | 71.76 |
| 29.   | <i>Viola canescens</i>        | Thandi jari       | 31 | 35 | 88.57 |

<https://doi.org/10.1371/journal.pone.0255010.t005>

In another parameter family index (FI) was determined according to number of plants used in different ethnobotanical perspectives in the study area. FI results indicated that family Asteraceae ranked 1<sup>st</sup> with 12 species, followed by Lamiaceae (10 spp.) and lowest FI was 04 species for Rosaceae (Table 6). This high occurrence of plants of Asteraceae is that plants of this family are cosmopolitan and have wide of range of occurrence, probably due to good seed dispersal mechanism. These findings were very closely supported by Mehwish and her colleagues who stated that Asteraceae has high occurrence in AJK areas [28,30]. FL and FI both along with other statistical analytical tools have been employed in different research studies which proves the efficacy of medicinal plants being used as herbal therapeutics and also production of allopathic medicines using different pharmaceutical procedures in the industries [49–51].

Another statistical tool, Spearman's rank correlation (SRC) test was employed for authentication of ethnomedicinal uses of the wild indigenous plants (WIPs) of Dawarian and Ratti Gali of District Neelam of AJK. SRC is used to confirm that (i) "either the number of uses of plants increases with increases in the number of species?" and (ii) to correlate traditional indigenous knowledge (TIK) of males and females to find out facts that either females have better TIK



**Table 6. Family index in study area of two villages Dawarian and Ratti Gali of AJK, Pakistan.**

| S. No. | Family        | Number of species | Ranking         |
|--------|---------------|-------------------|-----------------|
| 1      | Asteraceae    | 12                | 1 <sup>st</sup> |
| 2      | Lamiaceae     | 10                | 2 <sup>nd</sup> |
| 3      | Polygonaceae  | 7                 | 3 <sup>rd</sup> |
| 4      | Papilionaceae | 6                 | 4 <sup>th</sup> |
| 5      | Pinaceae      | 5                 | 5 <sup>th</sup> |
| 6      | Poaceae       | 4                 | 6 <sup>th</sup> |
| 7      | Rosaceae      | 4                 | 7 <sup>th</sup> |

<https://doi.org/10.1371/journal.pone.0255010.t006>

as compared to males or not". It was proved that number of ethnomedicinal uses increases with increases the number of plant species in the study. Furthermore it was confirmed that old vil-  
lage women had more TIK of wild plants and this may be due to fact that female mostly live in  
their native towns and have more knowledge of herbal therapeutics as compared to men who  
mostly go abroad or out of hometowns for jobs and other purposes, so they forget or have less  
opportunities for using and dependency on WIPs to cure various infirmities (Tables 10 and  
11). Where sR values for male were 0.733 while for female sR was 0.893. Both readings are near  
to p = 1; which proves that indigenous population (male and female) prevalently depend on  
wild resources for cure of different infirmities (Table 7). But female population had more  
knowledge and dependence than male in the area. Similar studies were conducted by Ahmad  
and his colleagues [24] in Kel area of Neelum Valley of Azad Jammu and Kashmir where he  
said female population had more information of plants for different domestic and commercial  
uses as compared to men (Table 8). In other study, Amjad and his colleagues conducted eth-  
nobotanical research work in Toli Peer National Park, Azad Jammu and Kashmir, where they  
proved that EB uses increases with increasing number of plants and their results coincided  
with our findings [28,29]. Similar statistical tools were also applied in an ethnobotanical expe-  
dition conducted by Mehwish *et al.*, 2019 on District Bhimber of Azad Jammu and Kashmir,  
Pakistan [30]. Similar results have been proved in past research works [52–54] which proves  
that rural area people still rely on wild flora for fulfilling the needs of their daily life and partic-  
ularly female retain and use TIK more prevalently than male which is due to restricted life in  
rural and remote areas which may be because of cultural barriers or lack of resources in the  
areas.

Informant consensus factor (ICF) was used to support the data and to see the degree of  
agreement on each plant reported by informants (Table 9). The highest value (0.94) of ICF was

**Table 7. Spearman correlation for Male informants from Dawarian and Rati Gali, AJK, Pakistan.**

| Age | Number of species | d 1 | Number of uses | d 2 | d = d 2 - d 1 | d <sup>2</sup> |
|-----|-------------------|-----|----------------|-----|---------------|----------------|
| 25  | 14                | 8   | 16             | 5   | -3            | 9              |
| 35  | 9                 | 2   | 4              | 1   | -1            | 1              |
| 44  | 16                | 6   | 28             | 7   | 1             | 1              |
| 55  | 12                | 4   | 11             | 3   | -1            | 1              |
| 66  | 7                 | 1   | 10             | 2   | 1             | 1              |
| 85  | 18                | 7   | 20             | 6   | -1            | 1              |
| 94  | 10                | 3   | 13             | 4   | 1             | 1              |

Sum of value of  $d^2 = 15$   $r_c = 1 - \frac{\sum d^2}{n(n^2-1)}$ ;  $r_c = 1 - \frac{[6 \times 15]}{7(7^2-1)}$ ;  $r_c = 1 - \frac{[90]}{7(49-1)}$ ;  $r_c = 1 - \frac{[90]}{7(48)}$ ;  $r_c = 1 - \frac{[90]}{336}$ ;  $r_c = 1 - [0.267]$ ;  $r_c = 1 - 0.267$ ;  $r_c = 0.733$ .

<https://doi.org/10.1371/journal.pone.0255010.t007>



**Table 8. Spearman correlation for female informants from Dawarian and Rati Gali, AJK, Pakistan.**

| Age | Number of species | d 1 | Number of uses | d 2 | d = d 2-d 1 | d <sup>2</sup> |
|-----|-------------------|-----|----------------|-----|-------------|----------------|
| 24  | 11                | 2   | 13             | 1   | -1          | 1              |
| 35  | 14                | 5   | 18             | 4   | -1          | 1              |
| 45  | 18                | 7   | 20             | 6   | -1          | 1              |
| 54  | 10                | 1   | 15             | 2   | 1           | 1              |
| 65  | 12                | 3   | 16             | 3   | 0           | 0              |
| 75  | 13                | 4   | 19             | 5   | 1           | 1              |
| 84  | 15                | 6   | 22             | 7   | 1           | 1              |

Sum of value of  $d^2 = 6$   $r_c = 1 - \frac{[\sum d^2]}{n(n^2-1)}$ ;  $r_c = 1 - \frac{[6 \times 6]}{7(7^2-1)}$ ;  $r_c = 1 - \frac{[36]}{7(49-1)}$ ;  $r_c = 1 - \frac{[36]}{7(48)}$ ;  $r_c = 1 - \frac{[36]}{336}$ ;  $r_c = 1 - [0.107]$ ;  $r_c = 1 - 0.107$ ;  $r_c = 0.893$ .

<https://doi.org/10.1371/journal.pone.0255010.t008>

for diseases group “tuberculosis and leucorrhea”, followed by stomachache and flatulence (0.93), diabetics and blood pressure (0.92) and asthma and chest infections (0.88) as shown in Table 9. The high values of ICF for Tuberculosis (TB), asthma and chest infections may be use of cold and high mountaineous house where smoke of burning of wood (used for fuel purpose to cook and heating purpose) causes lungs infirmities. Feminist disease leucorrhea’s high rate might be due to excessive eating of high energy (hot) foods to combat cold environment. The common occurrence of diabetics and blood pressure may be due to changes in life style and excessive uses of fat/ghee by the indigenous people. These findings are corroborate with previous research works [26,27]. The comprehensive ICF analysis depicted that similar types of infirmities were reported in other areas of AJK [53,56,65,66] and Pakistan [54,55,58,73–76].

The other common use of plants was fuel with ICF (0.83) purpose which is pivotal source for cooking and heating the rooms in chilling cold weather. The second was and thatching (ICF = 0.82) where people use plants or their parts for construction/thatching houses because people in study areas only depends on tree for houses/shelter formation. The lowest value is for fodder 0.18 (Table 10). Similar findings were correlated and strongly supported by Farooq and his colleagues [26]. Our both ICF results for ethnomedicines and ethnobotanical were coincidence with past researchers published by different scientists in rest of the world [30].

According to direct matrix ranking (DMR) analysis was calculated to determine biotic pressure and conservation status of different plant species being used by indigenous people of the

**Table 9. Informant consensus factor (ICF) for different diseases categories from Dawarian and Rati Gali, AJK, Pakistan.**

| Diseases                      | Species (nt) | All spp. % | Used citation (nur) | All citation % | ICF = $\frac{(nur-nt)}{(nur-1)}$ |
|-------------------------------|--------------|------------|---------------------|----------------|----------------------------------|
| Cough and cold                | 16           | 12.03      | 125                 | 11.92          | 0.88                             |
| Stomachache and flatulence    | 21           | 15.79      | 345                 | 32.89          | 0.94                             |
| Asthma and chest infections   | 15           | 11.28      | 143                 | 13.63          | 0.90                             |
| Joint and muscle pain         | 9            | 6.77       | 65                  | 6.20           | 0.88                             |
| Fever and malaria             | 9            | 6.77       | 36                  | 3.43           | 0.77                             |
| Epilepsy and mental disorders | 9            | 6.77       | 33                  | 3.15           | 0.75                             |
| Dysentery and bowls           | 19           | 14.29      | 53                  | 5.05           | 0.65                             |
| Cardiovascular disorders      | 7            | 5.26       | 45                  | 4.29           | 0.86                             |
| Snake and other bites         | 7            | 5.26       | 25                  | 2.38           | 0.75                             |
| Kidney and urinary disorders  | 8            | 6.02       | 18                  | 1.72           | 0.59                             |
| Diabetics and blood pressure  | 8            | 6.02       | 93                  | 8.87           | 0.92                             |
| Tuberculosis and leucorrhea   | 5            | 3.76       | 68                  | 6.48           | 0.94                             |

<https://doi.org/10.1371/journal.pone.0255010.t009>

**Table 10. Informant consensus factor (ICF) for different categories from Dawarian and Rati Gali, AJK Pakistan (for other purposes).**

| Category        | Species (nt) | All spp. % | Use citation (nur) | All citation % | ICF = $\frac{(nur-nt)}{(nur-1)}$ |
|-----------------|--------------|------------|--------------------|----------------|----------------------------------|
| Fodder          | 28           | 35.44      | 34                 | 16.59          | 0.18                             |
| Food            | 14           | 17.72      | 17                 | 8.29           | 0.19                             |
| Fuel            | 19           | 24.05      | 105                | 51.22          | 0.83                             |
| Furniture       | 9            | 11.39      | 14                 | 6.83           | 0.38                             |
| Construction    | 5            | 6.33       | 17                 | 8.29           | 0.75                             |
| House Thatching | 4            | 5.06       | 18                 | 8.78           | 0.82                             |

<https://doi.org/10.1371/journal.pone.0255010.t010>

area. The data proved that *P. wallichiana* was most prevalently used (DMR = rank-1<sup>st</sup>) and it was under severe threats due to anthropogenic activities. *C. deodara* ranked 2<sup>nd</sup> which is also used for fuel, construction and preferably for commercial purpose that may be smuggling of its valuable timber in local and national markets (Table 11). The third species was *P. roxburghii* which depicted that this plant is multifariously used for domestic and commercial needs and its wood being of high worth is also smuggled which created need of conservation. These findings were strongly justified by different taxonomists in various studies. They calculated DMR from various regions of the world as strongly correlated with our studies [35–40].

Thus, the current study is very useful and of high significance because it provides baseline primary data on WIPs being commonly used in various traditional ethnomedicines (TEMs). This research provides pivotal information for conservation of cultural diversity of comparatively isolated and remote areas of Neelam valley. This study also documents the phytodiversity of indigenous wild flora and domestic as well as commercial worth is mentioned. The research indicated that there is dare need to conserve TEMs knowledge of area before it is diminished or eroded from the region. The study will also assist to initiate protection measures and conserve the near-to-threatened species as indicated in DMR analysis.

Through this study important and unique medicinal plants can be selected for further phytochemical studies to confirm their ethnopharmacological analysis and drug discovery. In study area, out of total 103 plants about 58 (56.31%) are the plants which have not been reported for any traditional ethnomedicine uses from Pakistan which proves the novelty of the research work. Albeit 27 plant species (26.21%) having reported in past studies for TEMs but in this research work very different traditional ethnomedicinal use-reports are documented (Table 12). It proves that area has unique biocultural diversity (BCD) and phytogeography as well as phytodiversity. These explorations are of high worth because reported first time in this study and it will provide valuable future research for drug discovery and development. The

**Table 11. Direct matrix ranking (DMR) of tree species with different uses other than medicinal value from Dawarian and Rati Gali, AJK, Pakistan.**

| Uses                | <i>P. wallichiana</i> | <i>P. roxburghii</i> | <i>P. smithiana</i> | <i>C. deodara</i> | <i>A. pindrow</i> | <i>A. cappadocicum</i> | <i>P. alba</i>  | <i>S. tetrasperma</i> |
|---------------------|-----------------------|----------------------|---------------------|-------------------|-------------------|------------------------|-----------------|-----------------------|
| Construction        | 40                    | 40                   | 35                  | 36                | 30                | 0                      | 0               | 0                     |
| Hedging and Fencing | 20                    | 18                   | 15                  | 10                | 15                | 14                     | 20              | 22                    |
| Fire wood           | 25                    | 29                   | 35                  | 38                | 30                | 32                     | 28              | 19                    |
| Cash income         | 40                    | 38                   | 30                  | 35                | 20                | 0                      | 2               | 0                     |
| Fodder              | 5                     | 2                    | 8                   | 4                 | 10                | 20                     | 22              | 29                    |
| Fruit, Food         | 0                     | 0                    | 0                   | 5                 | 0                 | 0                      | 0               | 0                     |
| Total               | 130                   | 127                  | 123                 | 128               | 105               | 66                     | 72              | 70                    |
| Rankings            | 1 <sup>st</sup>       | 3 <sup>rd</sup>      | 4 <sup>th</sup>     | 2 <sup>nd</sup>   | 5 <sup>th</sup>   | 8 <sup>th</sup>        | 6 <sup>th</sup> | 7 <sup>th</sup>       |

<https://doi.org/10.1371/journal.pone.0255010.t011>

Table 12. Novelty aspect analysis by comparing of ethnobotanical and ethnomedicinal uses of indigenous plants from Dawarian and Rati Gali, AJK (Pakistan).

| S. No. | Species name                                              | Already reported traditional ethnomedicinal uses                                                                                     | Newly reported ethnomedicinal uses                                                                                                                                                                                                                     |
|--------|-----------------------------------------------------------|--------------------------------------------------------------------------------------------------------------------------------------|--------------------------------------------------------------------------------------------------------------------------------------------------------------------------------------------------------------------------------------------------------|
| 1      | <i>Acer cappadocicum</i> Gled.                            | It is used as a fuel (Sher et al., 2011).                                                                                            | It is used as ethnomedicine to cure diabetes, dysentery and diarrhea.                                                                                                                                                                                  |
| 2      | <i>Ajuga bracteosa</i> Wall.                              | It is used for blood purification as cited by (Hussain et al., 2006). Used to treat abdominal pain as cited by (Ahmad et al., 2011). | The flower powder is used for cure of diabetes. The root tea is used for killing of stomach worms. Paste of leaf helpful to cure headache.                                                                                                             |
| 3      | <i>Ajuga parviflora</i> Benth.                            | Nil                                                                                                                                  | The plant leaf extract is used for cure of typhoid and malaria. The root decoction is used for cure of chronic fever and chest pains                                                                                                                   |
| 4      | <i>Allium griffithianum</i> Boiss.                        | It is used to cure cough as cited by (Khan et al., 2015).                                                                            | It is used to cure fever. It is used as tonic for early digestion of food.                                                                                                                                                                             |
| 5      | <i>Aconogonon alpinum</i> (All.) Schur MUH-1779           | Leaves are used as food as cited by (Mahmood et al., 2011).                                                                          | Root is used for the treatment of joints pain and tonic as wormicidal.                                                                                                                                                                                 |
| 6      | <i>Actaea spicata</i> L. MUH-1780                         | Nil                                                                                                                                  | The leaf extract is used for curing of nerve infirmities, joints inflammation, leucorrhea and rheumatism.                                                                                                                                              |
| 7      | <i>Aesculus indica</i> (Wall. ex Cambess.) Hook. MUH-1781 | It is used as fuel as cited by (Sher et al., 2011).                                                                                  | The root powder is used for treatment of rheumatic pains. The bark extract is used for curing of headache.                                                                                                                                             |
| 8      | <i>Aconitum heterophyllum</i> Wall. ex Royle MUH-1782     | Roots are used to treat fever and vomiting as cited by (Hazrat et al., 2011). Used to treat fever as cited by (Kumar et al., 2009).  | The root decoction is used as expectorant and febrifuge agent. The bark powder is used for cure of inflammation and chronic joints pains.                                                                                                              |
| 9      | <i>Abies pindrow</i> Royle. MUH-1783                      | Nil                                                                                                                                  | The paste of the leaf is applied on cuts wounds bruises to get rid of bacteria and germs. The root tea is used for cure of asthma and cough. Seeds decoction is used for treating fever, hyperglycemia and bronchitis.                                 |
| 10     | <i>Achillea millefolium</i> L. MUH-1784                   | Nil                                                                                                                                  | Paste prepared from this plant is used in stanching the flow of blood from wounds. Leaves are chewed to treat teeth pain. Leaf juice is poured in ear to treat ear pain. Plant is also used to treat T. B., stomach disorder and fever in form of Tea. |
| 11     | <i>Artemisia japonica</i> Thunb. MUH-1785                 | Nil.                                                                                                                                 | The juice of leaves is used for cough and asthma.                                                                                                                                                                                                      |
| 12     | <i>Anaphalis triplinervis</i> Clarke MUH-1786             | Nil                                                                                                                                  | The leaf decoction is used in cure of epilepsy. The whole plant paste is used for treating of animal feet diseases as ethnoveterinary medicines.                                                                                                       |
| 13     | <i>Artemisia macrophylla</i> Fisch. ex Besser MUH-1787    | Nil                                                                                                                                  | The root powder is used for cure of brunt wounds. The flower is used to make admixture of flower with sugar and is used for cure of body tonic                                                                                                         |
| 14     | <i>Astragalus graveolens</i> Benth. MUH-1788              | Nil.                                                                                                                                 | Leaf is used for cure of wounds. Fruit is eatable and used as antioxidant agent.                                                                                                                                                                       |
| 15     | <i>Ajuga parviflora</i> Benth MUH-1789                    | Nil.                                                                                                                                 | It is used as fodder.                                                                                                                                                                                                                                  |
| 16     | <i>Adiantum aethiopicum</i> L. MUH-1790                   | Nil                                                                                                                                  | Juice of leaves is used for the treatment of chest burning, stomachache and blood purification.                                                                                                                                                        |
| 17     | <i>Arisaema tortuosum</i> (Wall.) Schott MUH-1791         | Tubers are applied over wound of snake bite as cited by (Swarnkar and Katewa, 2008).                                                 | The roots are used as wormicide. The extract of leaf is used to cure cattle worms and stomach issues.                                                                                                                                                  |
| 18     | <i>Astragalus chlorostachys</i> Bunge MUH-1792            | Nil                                                                                                                                  | The plant is used as fodder for the livestock and cattle.                                                                                                                                                                                              |
| 19     | <i>Bergenia ciliata</i> (Haw.) Sternb. MUH-1793           | Nil                                                                                                                                  | Extracts of leaves is used as earaches relieve while roots are used as a tonic in treatment of fevers, diarrhoea and pulmonary affections.                                                                                                             |
| 20     | <i>Berberis lycium</i> Royle MUH-1795                     | Decoction of roots is used to treat internal wounds especially bone fractures as cited by (Mahmood et al., 2011).                    | Dried leaves are used for the treatment of headache, stomachache, joints pain and toothache.                                                                                                                                                           |
| 21     | <i>Bistorta amplexicaulis</i> (D. Don) Greene MUH-1796    | Plant is used for making tea as cited by (Qureshi et al., 2007).                                                                     | Dried root is used as tea to cure stomachache. The herbaceous roots are tonic for enhancing of cow milk. The root decoction is used for cure of toothache.                                                                                             |
| 22     | <i>Buddleja crispa</i> Benth. MUH-1797                    | Plant is used as fuel as cited by (Irfan et al., 2018).                                                                              | The root infusion is used for curing wound healing by increasing platelets. Its leaf extract is used for inflammation and analgesic purpose.                                                                                                           |

(Continued)

Table 12. (Continued)

| S. No. | Species name                                             | Already reported traditional ethnomedicinal uses                                                                                        | Newly reported ethnomedicinal uses                                                                                                                                                               |
|--------|----------------------------------------------------------|-----------------------------------------------------------------------------------------------------------------------------------------|--------------------------------------------------------------------------------------------------------------------------------------------------------------------------------------------------|
| 23     | <i>Buxus wallichiana</i> Baill. MUH-1798                 | Nil                                                                                                                                     | Dried leaves are used in the treatment of joints pain and muscles pain.                                                                                                                          |
| 24     | <i>Convolvulus arvensis</i> L. MUH-1799                  | It is used as fodder as cited by (Zabiullah et al., 2006).                                                                              | Leaf is used as vegetable which is purgative and laxative. The stem paste is used for treating of joints pain                                                                                    |
| 25     | <i>Cirsium arvense</i> (L.) Scop. MUH-1800               | Nil                                                                                                                                     | Powdered form mix with water is used as tonic.                                                                                                                                                   |
| 26     | <i>Campanula pallida</i> Wall. MUH-1801                  | Nil                                                                                                                                     | The root decoction is used for treating scabies.                                                                                                                                                 |
| 27     | <i>Cynoglossum lanceolatum</i> Forssk. MUH-1802          | Plant powder is used as laxative as cited by (Amjad et al., 2015).                                                                      | The foliar past is applied on abscess to remove pus. It is also use in asthma.                                                                                                                   |
| 28     | <i>Cuscuta reflexa</i> Roxb. MUH-1803                    | Nil                                                                                                                                     | Juice of the whole plant used to increase the length of hairs and make strong. Its decoction is used in jaundice and cure of spleen disorders. The infusion is used for treating urinary issues. |
| 29     | <i>Cedrus deodara</i> (Roxb. ex D. Don) G. Don MUH-1804  | Oil of wood is used for skin diseases as cited by (Ishtiaq et al., 2013).                                                               | Oil of wood is used for toothache. Wood is also used as fuel. The leaf decoction is used for treating of piles. The root burnt used to cure epilepsy.                                            |
| 30     | <i>Corylus colurna</i> L. MUH-1806                       | Nil                                                                                                                                     | The leaf extract is used as antioxidant. Leaf extract is useful as cure of snake poison.                                                                                                         |
| 31     | <i>Corydalis vaginans</i> Royle MUH-1807                 | Nil                                                                                                                                     | The sap of the plant is used in the treatment of eye diseases.                                                                                                                                   |
| 32     | <i>Cotoneaster microphyllus</i> Wall. ex Lindl. MUH-1808 | Nil                                                                                                                                     | The leaf decoction is used for treating of diarrhoea. The root powder is used as effective to cure wounds.                                                                                       |
| 33     | <i>Corydalis govaniana</i> Wall. MUH-1809                | Nil                                                                                                                                     | Juice of leaves is used for the treatment of fever and skin problem.                                                                                                                             |
| 34     | <i>Caltha alba</i> Cambess. MUH-1810                     | Nil                                                                                                                                     | Dried powdered or juice of this plant is used to reduce muscle pain and sedative.                                                                                                                |
| 35     | <i>Cenchrus pennisetiformis</i> Steud. MUH-1811          | Used as fodder for cattle as cited by (Chaudhari et al., 2013).                                                                         | The leaf extract is used for cure of bacterial infections. It is used as fodder for cattle and rodents.                                                                                          |
| 36     | <i>Clinopodium vulgare</i> L. MUH-1812                   | Nil                                                                                                                                     | A sweet and aromatic herb tea is made from the fresh leaf for cure of headache and migraine pain.                                                                                                |
| 37     | <i>Erysimum hieraciifolium</i> L. f. MUH-1814            | Nil                                                                                                                                     | The leaf decoction is used for cure of foot rot. The root infusion is used for treatment of pimples and bruises on legs.                                                                         |
| 38     | <i>Erysimum hedgearum</i> Al-Shehbaz MUH-1815            | Nil                                                                                                                                     | The juice of whole plant is use to kill lice in animals.                                                                                                                                         |
| 39     | <i>Euonymus hemsleyanus</i> Loes. MUH-1816               | Nil                                                                                                                                     | The leaf decoction is used as tonic for hair growth. It is used as fodder cattle and rodents.                                                                                                    |
| 40     | <i>Elsholtzia strobilifera</i> (Benth.) Benth. MUH-1817  | Nil                                                                                                                                     | The root infusion is used for treating indigestion, flatulence and diarrhea. The stem bark is used for cure of pharyngitis disorders.                                                            |
| 41     | <i>Fragaria nubicola</i> Lacaite MUH-1818                | Fruit is edible as cited by (Qureshi et al., 2007).                                                                                     | The leaf decoction is used for curing of blemishes infirmities. The fruit extract with milk is used for damaged and broken nerve disorders..                                                     |
| 42     | <i>Geranium rotundifolium</i> L. MUH-1819                | The dried roots were grinded, sugar and milk are added in it, and then used for pain relief of joints as cited by (Ahmed et al., 2013). | The dried roots were grinded, sugar and milk are added in it, and then used for pain relief of joints. The root decoction is used to cure epilepsy                                               |
| 43     | <i>Geranium villosum</i> Ten. MUH-1820                   | Nil                                                                                                                                     | It is used as food for cure of edema.                                                                                                                                                            |
| 44     | <i>Gerbera gossypina</i> (Royle) Beauverd MUH-1821       | Nil                                                                                                                                     | Root paste is applied to wounds to control bleeding.                                                                                                                                             |
| 45     | <i>Hylotelephium ewersii</i> (Ledeb.) H. Ohba MUH-1822   | Nil                                                                                                                                     | It is believed to be having cooling effect if the juice of the leaves mix with water and drink.                                                                                                  |
| 46     | <i>Indigofera heterantha</i> Brandis MUH-1824            | Shoots are used as fodder, branches as ropes, brooms and fuel as cited by (Hazrat et al., 2011).                                        | The leaf decoction is used for cure of stomach disorder and abdominal pains.                                                                                                                     |

(Continued)

Table 12. (Continued)

| S. No. | Species name                                                        | Already reported traditional ethnomedicinal uses                                                               | Newly reported ethnomedicinal uses                                                                                                                 |
|--------|---------------------------------------------------------------------|----------------------------------------------------------------------------------------------------------------|----------------------------------------------------------------------------------------------------------------------------------------------------|
| 47     | <i>Isodon rugosus</i> (Wall.) Codd<br>MUH-1825                      | Nil                                                                                                            | Juice of the leaves is used for stomachache.                                                                                                       |
| 48     | <i>Juniperus communis</i> Brand.<br>MUH-1827                        | Nil                                                                                                            | The decoction of root is used for cure of inflammation and diarrhea. The leaf extract is used as microbicide and antiseptic.                       |
| 49     | <i>Lespedeza juncea</i> (L.f.) Pers.<br>MUH-1828                    | Nil                                                                                                            | The decoction of root is used as cure of diarrhea and dysentery. The leaf tea is used for stomach pains.                                           |
| 50     | <i>Ligularia thomsonii</i> Clarke.<br>MUH-1829                      | Nil                                                                                                            | Dried root or powdered of root is used in the treatment of asthma, stimulate blood flow, reduce inflammation and stopping cough.                   |
| 51     | <i>Mentha longifolia</i> L. MUH-1830                                | Used to cure stomach disorders as cited by (Kilic et al., 2013).                                               | Shoot is used for gas trouble. Juice of leaves expels worms from the stomach. It is also as condiment.                                             |
| 52     | <i>Matricaria chamomilla</i> L. MUH-1831                            | Nil                                                                                                            | Root powder is used for toothache. The leaf decoction is used in relief of fever and inflammation.                                                 |
| 53     | <i>Meliosma simplicifolia</i> (Roxb.) Walp. MUH-1833                | Nil                                                                                                            | Leaf decoction is used as cure of inflammation reducer of legs and broken joints.                                                                  |
| 54     | <i>Oxalis corniculata</i> L. MUH-1834                               | Nil                                                                                                            | Juice of leaves and flowers mixed together is used for the treatment of eyes.                                                                      |
| 55     | <i>Onychium japonicum</i> (Thunb.) Kunze MUH-1835                   | Nil                                                                                                            | It is used as vegetable. Dried root or powdered root is used for the treatment of asthma and flu.                                                  |
| 56     | <i>Onosma bracteata</i> Wall. MUH-1837                              | Leaf infusion is taken for stomachache as cited by (Rashid et al., 2018).                                      | Powder of dry root is used against asthma and bronchitis. Decoction of leaf is given in stomach and bladder irritation.                            |
| 57     | <i>Origanum vulgare</i> L. MUH-1838                                 | Nil                                                                                                            | It is used for muscles pain, cold and toothache. It is also as vegetable and fodder.                                                               |
| 58     | <i>Polygala chinensis</i> L. MUH-1839                               | Nil                                                                                                            | This plant is used for treatment of snake bites.                                                                                                   |
| 59     | <i>Pedicularis brevifolia</i> D.Don<br>MUH-1841                     | Nil                                                                                                            | Powdered leaf is used for the treatment of cough, fever, asthma and skin disease. Dried or powdered root is used for the treatment of stomachache. |
| 60     | <i>Primula denticulata</i> Sm. MUH-1842                             | Nil                                                                                                            | Juice of stem is used for eye diseases.                                                                                                            |
| 61     | <i>Podophyllum hexandrum</i> Royle<br>MUH-1843                      | Nil                                                                                                            | Powdered leaf is used in the treatment of asthma. It is also used to reduce bulb in throat.                                                        |
| 62     | <i>Populus alba</i> L. MUH-1844                                     | Used as a fuel as cited by (Khan and Khatoun, 2007).                                                           | The leaf decoction is used to cure gout, joint pain and arthritis. The root infusion is used for backbone and lumber pains.                        |
| 63     | <i>Plantago lanceolata</i> L. MUH-1845                              | Nil                                                                                                            | The root tea is used for cure of cold, flu and fever. The bark extract is employed is used for cure of debility and body general weakness.         |
| 64     | <i>Persicaria mitis</i> (Schrank) Holub<br>MUH-1846                 | Nil                                                                                                            | Tea is made by root which help to reduce the joints pain.                                                                                          |
| 65     | <i>Podophyllum emodi</i> Wall. ex Hook.f. & Thomson MUH-1848        | Nil                                                                                                            | The root tea is used to cure colds, fever and cough. The bark powder is used for cure of wounds.                                                   |
| 66     | <i>Pinus wallichiana</i> A.B.Jacks.<br>MUH-1849                     | Wood is used for construction purposes, seeds are edible and cones are used as fuel as cited by (Sinha, 2019). | Smell of resin reduce severe cough. Powder of leaf and bark used with cold water useful for dysentery.                                             |
| 67     | <i>Pinus roxburghii</i> Sarg. MUH-1850                              | Wood is used for furniture and fuel as cited by (Zabiuhullah, 2006).                                           | Powder of leaf and bark is used with cold water for dysentery. Smoke is used to repel the mosquitoes and other insects.                            |
| 68     | <i>Rosa macrophylla</i> Lindl. MUH-1851                             | Nil                                                                                                            | Fruit is used in fever to cure from it.                                                                                                            |
| 69     | <i>Rheum emodi</i> Wall. MUH-1852                                   | Leaves are used as vegetable as cited by (Khan et al., 2015).                                                  | The powdered root and stem mix together with hot water to relieve constipation.                                                                    |
| 70     | <i>Rubus niveus</i> subsp. <i>horsfieldii</i> (Miq.) Focke MUH-1853 | Nil                                                                                                            | The leaf decoction is used for cure of debility and menstrual disorders. The root extract is used to treat eye problems.                           |
| 71     | <i>Rheum australe</i> D. Don MUH-1854                               | Leaves are used as vegetable and root is used to treat wounds as cited by (Mahmood et al., 2011).              | Paste of root is used for wound healing.                                                                                                           |
| 72     | <i>Rhus succedanea</i> L. MUH-1855                                  | Used as fuel as cited by (Mahmood et al., 2011).                                                               | The root extract is used as antidote for scorpion sting. The root infusion is applied for as febrifuge and antivenous.                             |

(Continued)



Table 12. (Continued)

| S. No. | Species name                                       | Already reported traditional ethnomedicinal uses                                     | Newly reported ethnomedicinal uses                                                                                                                                    |
|--------|----------------------------------------------------|--------------------------------------------------------------------------------------|-----------------------------------------------------------------------------------------------------------------------------------------------------------------------|
| 73     | <i>Sorghum halepense</i> Pers. MUH-1859            | Used as fodder as cited by (Ahmad et al., 2011).                                     | Juice of root is used for the asthma.                                                                                                                                 |
| 74     | <i>Senecio chrysanthemoides</i> DC. MUH-1860       | Nil                                                                                  | Leaf decoction is used for cure of rashes and bruises. Root paste is used for scorpion sting antidote.                                                                |
| 75     | <i>Skimmia laureola</i> Franch. MUH-1861           | Nil                                                                                  | Tea is made by dry leaves which is very effective in joints pain, muscles pain, stomach pain and bone pain. Powdered leaves also used in deserts.                     |
| 76     | <i>Symplocos paniculata</i> (Thunb.) Miq. MUH-1863 | Nil                                                                                  | Powdered leaf is used in the treatment of menorrhagia, eye disease.                                                                                                   |
| 77     | <i>Sarcococca saligna</i> Müll.Arg. MUH-1864       | Nil                                                                                  | Powdered leaf is used in constipation, blood purification and muscles relaxation.                                                                                     |
| 78     | <i>Satyrium nepalense</i> D.Don MUH-1865           | Used as tonic and to cure dysentery and malaria as cited by (Pant and Samant, 2010). | Tubers are used as tonic and to cure dysentery and malaria fever.                                                                                                     |
| 79     | <i>Scutellaria linearis</i> Benth. MUH-1866        | Nil                                                                                  | Powdered leaf is used to reduce inflammation and diarrhea.                                                                                                            |
| 80     | <i>Swertia paniculata</i> Wall. MUH-1867           | Nil                                                                                  | Leaf extract is used to cure hepatic disorders. The root decoction is used to treat diabetes.                                                                         |
| 81     | <i>Solidago capitata</i> Fisch. ex Herder MUH-1868 | Nil                                                                                  | Powdered plant is used to heal wounds.                                                                                                                                |
| 82     | <i>Thymus linearis</i> Benth. MUH-1869             | Nil                                                                                  | Tea is made by this plant which help to reduce fats in body, abdominal pain and gas trouble.                                                                          |
| 83     | <i>Taxus baccata</i> L. MUH-1870                   | Nil                                                                                  | The leaf extract is used to treat cold and fever. The root powder is used for treatment of cough and chest pains. It is also used for preparation of taxol medicines. |
| 84     | <i>Viola biflora</i> L. MUH-1872                   | Nil                                                                                  | Leaves are used as vegetables. Tea is made by dry leaf which helps in cough headache and flu.                                                                         |
| 85     | <i>Viscum album</i> L. MUH-1875                    | Nil                                                                                  | Powdered leaves are used in the treatment of cough and asthma.                                                                                                        |
| 86     | <i>Valeriana jatamansi</i> Jones MUH-1876          | Nil                                                                                  | Powdered root is used for the treatment of joints pain. It is also used in sweet dishes.                                                                              |
| 87     | <i>Viola canescens</i> Wall. MUH-1877              | Flowers and leaves are used to treat cough as cited by (Gilani et al., 2006).        | Powder of leaf and flowers is given internally in the treatment of coughs and asthma.                                                                                 |
| 88     | <i>Wulfenia amherstiana</i> Benth. MUH-1878        | Nil.                                                                                 | Root decoction is used to cure kidney disorders.                                                                                                                      |

<https://doi.org/10.1371/journal.pone.0255010.t012>

local people of the area primarily are dependent on wild resources for life necessities and it is coincided with past works cited in the literature, where it is proved that rural people majorly use wild plants for coping daily life needs [55–68].

The results indicated that many species are first time reported from the study area and these are novel reporting and documentation of ethnomedicinal uses. The collected data will be helpful in future drug discovery and drug development. Many Similar type of justifications for conducting such type of ethnobotanical research proves clues and directives for further research to discover neo-drugs and development and in this research there is also huge scope for drug discovery [66–72]. The plants are play pivotal role in daily of human being because they provide all fundamental needs of man, animals, birds and other microbes as well. The ecosystem services can only proceed if the plants are present in good number (population) otherwise there will be shrinkage and stoppages of ecosystem workings in any part of the earth or biosphere. This will also change the life of indigenous people of any area in the world. The plants provide mainstream pathway for their use to cure infirmities of man and livestock as well. The plants are producers with role in life sustenance for the human being in form of

food, forage, fodder, fuel, timber and medicines provisions to meet the life necessities of indigenous communities [73–76]. Hence, this study will be very fruitful to document the ethnobotanical uses and explore their potential for drug production and also devise the conservation status of various plants for future use. It will also assist to preserve TEK of folklore cultural diversity and conserve near to threatened species.

## Conclusion

The present research was focused to explore the various ethnobotanical uses of plants from unexplored areas Dawarian and Rati Gali of District Neelam, Azad Jammu and Kashmir using quantitative ethnobotanical tools. This research was carried out by interviewing the local peoples through a questionnaire method using structured and semi-structured procedure. The analytical tools proved which plants have more medicinal potential than other and recommend the further ethnopharmacological analysis to discover drug. Local peoples use indigenous wild plants to cure different diseases like asthma, dysentery, cancer, diabetes, epilepsy, cardiovascular disorders, constipation, cold, fever, stomachache, joint pain, arthritis, wound healing, kidney infection and skin diseases. About 58 (56.31%) plants species are hitherto not reported for their TEMs use from Pakistan and elsewhere and hence, reported first time which make this study valuable for further ethnopharmacological research to discover new drugs. Whereas 27 (26.21%) plants TEMs are described here which are prior not published and these novel in the research. So, this study will be useful those for the local peoples and researchers in different fields such as ethnopharmacology, agriculture, phytochemistry, pharmacy, biotechnology and conservationists for future work. Moreover, this study recommends the future phytochemical analysis to authenticate the bioconstituent which may be used for novel drug formation to cope the MDR bacteria and other microbial infirmities.

## Acknowledgments

The work is acknowledged with tribute to the indigenous people of the study area who provided ethnobotanical information for completion of this research project.

## Author Contributions

**Conceptualization:** Muhammad Ishtiaq, Abdul Ghani.

**Data curation:** Muhammad Ajaib.

**Formal analysis:** Khizar Hayat Bhatti.

**Investigation:** Iqbal Hussain.

**Methodology:** Waheeda Mushtaq, Abdul Ghani.

**Project administration:** Sardar Muhammad Rafique Khan.

**Resources:** Mehwish Maqbool.

**Software:** Tanveer Hussain.

**Validation:** Muhammad Azeem.

**Visualization:** Sumaira Thind.

**Writing – original draft:** Rohina Bashir.

## References

1. Husain ZS, Malik RN, Javaid M, Bibi S. Ethnobotanical properties and uses of medicinal plants of Morgha Biodiversity Park, Rawalpindi. *Pakistan Journal of Botany*. 2008; 40(5):1897–1911.
2. Mahmood A, Qureshi RA, Mahmood A, Sangi Y, Shaheen HM, Ahmad I, et al. Ethnobotanical survey of common medicinal plants used by people of District Mirpur, AJK, Pakistan. *Journal of Medicinal Plants Research*. 2011; 5(18):4493–4498.
3. Shinwari ZK. Medicinal plants research in Pakistan. *Journal of Medicinal Plant Research*. 2010; 4(3):161–176.
4. Khan MA, Hussain M, Mujtaba G. An Ethnobotanical Inventory of Himalayan Region Poonch Valley Azad Kashmir Pakistan. *Ethnobotanical Research and Application*. 2010. 8:107–123.
5. Ibrar M, Hussain, Sultan A. Ethnobotanical studies on plant resources of Ranyal hill, District Shangla, Pakistan. *Pakistan Journal of Botany*. 2007; 39(2):329–337.
6. Ajaib M, Ashraf Z, Riaz F, Siqqidue MF. Ethnobotanical studies of some plants of Tehsil Kharian, District Gujrat. *FUUAST Journal of Biology*. 2014; 4(1):65–71.
7. Malik RN, Husain SZ, Nazir I. Heavy metal contamination and accumulation in soil and wild plant species from industrial area of Islamabad. *Pakistan Journal of Botany*. 2010; 42(1):291–301.
8. Prabhu S, Kumar V. Ethnobotanical study of Traditionally Used Medicinal Plants in Malayali Ethnic People of Pachamalai Hills, Tamil Nadu, India. *Journal of Pharmaceutical Medicinal Research*. 2016; 2(1):39–42.
9. Tangjang S, Nima D, Chocha A, Anggu L. An ethnobotanical survey of medicinal plants in the Eastern Himalayan zone of Arunachal Pradesh, India. *Journal of Ethnopharmacology*. 2010; 134:18–25. <https://doi.org/10.1016/j.jep.2010.11.053> PMID: 21129478
10. Pardo-de-Santayana M, Tardio J, Blanco E, Carvalho AM, Lastra JJ, Miguel ES. Traditional knowledge of wild edible plants used in the northwest of the Iberian Peninsula (Spain and Portugal): a comparative study. *Journal of Ethnobiology and Ethnomedicine*. 2007. <https://doi.org/10.1186/1746-4269-3-27> PMID: 17555572
11. Sharma L, Deepika T, Sanjay KU. Plant-derived utility products: knowledge comparison across gender, age and education from a tribal landscape of western Himalaya. *Journal of Ethnobiology and Ethnomedicine*. 2019; 15:67. <https://doi.org/10.1186/s13002-019-0346-8> PMID: 31842917
12. Shaikh SH, Malik F, James H, Abdul H. Trends in the use of complementary and alternative medicine in Pakistan: a population-based survey. *Journal of Alternative and Complement Medicines*. 2009; 15(5):545–50. <https://doi.org/10.1089/acm.2008.0232> PMID: 19422284
13. Ahmad KS, Sadaf H. Indigenous Knowledge of Some Medicinal plants of Himalaya Region, Dawarian Village, Neelum Valley, Azad Jammu and Kashmir, Pakistan. *Journal of Plant Sciences*. 2014; 2(2):40–47.
14. Parvaiz M. Ethnobotanical studies on plant resources of Mangowal, District Gujrat, Punjab, Pakistan. *Journal of Phytomedicines*. 2014; 5:364–370. PMID: 25386399
15. Ajaib M, Khan ZUD, Annam Z. Ethnobotanical survey of some important herbaceous plants of District Kotli, Azad Jammu and Kashmir. *Biologia (Pak.)*. 2014; 60:11–22.
16. Ajaib M, Musfirah A, Nafeesa ZM Muhammad FS. Ethnobotanical study of some plants of Darguti, Tehsil Khairatta, Azad Jammu and Kashmir. *International Journal of Biological Research*. 2015; 3(2):101–107.
17. Mahmood A., Rifat N. M., Zabta K. S. and Aqeel M. Ethnobotanical Survey of plants from Neelum, Azad Jammu & Kashmir, Pakistan *Journal of Botany*. 2011; 43: 105–110.
18. Quave CL, Pieroni A. A reservoir of ethnobotanical knowledge informs resilient food security and health strategies in the Balkans. *Nature Plants*. 2015; 1(2):14021. <https://doi.org/10.1038/nplants.2014.21> PMID: 27246758
19. Amjad MS, Arshad M, Qureshi R. Ethnobotanical inventory and folk uses of indigenous plants from Pir Nasoora National Park, Azad Jammu and Kashmir. *Asian Pacific Journal of Tropical Biomedicines*. 2015; 5(3):234–41.
20. Ishtiaq CM, Khan M, Hanif W. An ethnomedicinal inventory of plants used for family planning and sex diseases treatment in Samahni valley, (AK) Pakistan. *Pakistan Journal of Botany*. 2006; 9(14):2546–55.
21. Akbar K. Potential impacts of climate change on plant diversity of hilly areas of Azad Kashmir and their mitigation: a review. *Journal of Mountains Area Research*. 2017; 2:37–44.
22. Ahmad KS, Qureshi R, Hameed M, Ahmad F, and Nawaz T. Conservation assessment and medicinal importance of some plants resources from Sharda, Neelum valley, Azad Jammu and Kashmir. *International Journal of Agriculture and Biology*. 2012b; 14: 997–1000.

23. Dar MEU. Ethnobotanical use of Lawat district Muzaffarabad, Azad Jammu and Kashmir. *Asian Journal of Plant Sciences*. 2003; 2 (9):680–682.
24. Ahmad KS, Abdul H, Fahim N, Mansoor H, Farooq A, Jiabin D, et al. Ethnopharmacological studies of indigenous plants in Kel village, Neelum Valley, Azad Kashmir, Pakistan. *Journal of Ethnobiology and Ethnomedicines*. 2017; 13:68. <https://doi.org/10.1186/s13002-017-0196-1> PMID: 29191238
25. Thompson A., Gemma M, Marie K, Jacinta T. Medicinal plant use in two Tiwi Island communities: a qualitative research study. *Journal of Ethnobiology and Ethnomedicines*. 2019; 15:40. <https://doi.org/10.1186/s13002-019-0315-2> PMID: 31419986
26. Ishtiaq M., Mehwish M, Ajaib M, Ahmed M, Iqbal H, Humaira K, et al. Ethnomedicinal and folklore inventory of wild plants used by rural communities of valley Samahni, District Bhimber Azad Jammu and Kashmir, Pakistan. 2021. *PLoS ONE* 16(1): e0243151. <https://doi.org/10.1371/journal.pone.0243151> PMID: 33439877
27. Mehwish M, Ajaib M. Hayat B Khizar. Ishtiaq M, Humaira K, Tanveer H. Ghani A. et al. Traditional Knowledge Based Inventory of Wild Plants of Watala National Park and Allied Villages from District Bhimber of Azad Jammu and Kashmir, Pakistan, *Journal of Applied Ecology And Environmental Research*. 2019. 7(5):12023–12055.
28. Ishtiaq M., Iqbal P., Hussain T. Ethnomedicinal and Economic Uses of Gymnosperms of Neelum Valley District Muzaffarabad Azad Kashmir Pakistan, *Indian Journal of Traditional Knowledge*. 2013. 12 (3), 404–410.
29. Amjad MS, Mf Q, Ahmad I, Khan SU, Chaudhari SK, Zahid Malik NZ, et al. Descriptive study of plant resources in the context of the ethnomedicinal relevance of indigenous flora: a case study from Toli Peer National Park, Azad Jammu and Kashmir, Pakistan. *PLoS One*. 2017; 12(2):171–896.
30. Cadena-González AL, Marten S, Ida T. Use and valuation of native and introduced medicinal plant species in Campo Hermoso and Zetaquira, Boyacá, Colombia. *Journal of Ethnobiology and Ethnomedicines*. 2013, 9:23.
31. Maqbool M, Muhammad A, Muhammad I, Shehzad A, Tanveer H. Ethnomedicinal Study of Plants Used in Phytotherapeutics among Indigenous Communities of District Bhimber, Azad Kashmir and Migrants to United Kingdom. *Life and Environmental Sciences*. 2019; 56 (2): 57–76.
32. Sher H, Bussmann RW, Hart R, Boer HJ. Traditional use of medicinal plants among Kalasha, Ismaeli and Sunni groups in Chitral District, Khyber Pakhtunkhwa province Pakistan. *Journal of Ethnopharmacology*. 2016; 188:57–69. <https://doi.org/10.1016/j.jep.2016.04.059> PMID: 27154408
33. Uniyal SK, Sharma V, Jamwal P. Folk medicinal practices in Kangra district of Himachal Pradesh, western Himalaya. *Human Ecology*. 2011; 39:479–88.
34. Polat R, Cakilcioglu U, Kaltalioglu K, Ulsan MD, Türkmen Z. An ethnobotanical study on medicinal plants in Espiye and its surrounding (Giresun-Turkey). *Journal of Ethnopharmacology*. 2015; 163:1–11. <https://doi.org/10.1016/j.jep.2015.01.008> PMID: 25614105
35. Oliver S. The role of traditional medicine practice in primary health care within Aboriginal Australia: a review of the literature. *Journal of Ethnobiology and Ethnomedicines*. 2013; 9(1):46. <https://doi.org/10.1186/1746-4269-9-46> PMID: 23819729
36. Mahmood A, Tabassum A. Ethnomedicinal survey of plants from District Saikot, Pakistan. *Journal of Applied Pharmacology*. 2(3): 212–220 (2011).
37. Qureshi RA, Ghufuran MA, Gilani SA. Ethnobotanical studies of selected medicinal plants of Sudhan Gali and Ganga Chotti Hills, district Bagh, Azad Kashmir. *Pakistan Journal of Botany*. 2007; 39 (7):2275–2283.
38. Rahman A H, Alam MS, Khan SK, Ahmed F, Islam AKMR, Rahman MM. Taxonomic studies on the family Asteraceae (Compositae) of the Rajshahi division. *Research Journal of Agriculture and Biological Sciences*. 2009; 4(2), 134–140.
39. Shinwari ZK, Gilani SS. Sustainable harvest of medicinal plants at Bulashbar Nullah, Astore (Northern Pakistan). *Journal of Ethnopharmacology*. 2003; 84: 289–298. [https://doi.org/10.1016/s0378-8741\(02\)00333-1](https://doi.org/10.1016/s0378-8741(02)00333-1) PMID: 12648828
40. da Silva MG, da Silva RH, Júnior GAD, Guarim-Neto G. Plants used by the rural community of Bananal, Mato Grosso, Brazil: Aspects of popular knowledge. *PloS One*. 2019; 14(1): 210. <https://doi.org/10.1371/journal.pone.0210488> PMID: 30699133
41. Reddy KN, Pattanaik C, Reddy CS, Murthy EN, Raju VS. Plants used in traditional handicrafts in north eastern Andhra Pradesh. *Indian Journal of Traditional Knowledge*. 2008; 7(1):162.
42. Sher Z, Khan Z, Hussain F. Ethnobotanical studies of some plants of Chagharzai valley, district Buner, Pakistan. *Pakistan Journal of Botany*. 2011.1; 43(3):1445–52.
43. Hamayun M. Ethnobotanical studies of some useful shrubs and trees of District Buner, NWFP, Pakistan. *Ethnobotanical Leaflets*. 2003. (1):12.

44. Ahmad I, Ibrar M, Ali N. Ethnobotanical study of tehsil kabal, swat district, KPK, Pakistan. *Journal of Botany*. 2011; 2011.
45. Khan AA, Ali F, Ihsan M, Hayat K, Nabi G. Ethnobotanical study of the medicinal plants of Tehsil Charbagh, district Swat, Khyber Pakhtunkhwa, Pakistan. *Amercian- Eurasian Journal of Agriculture Environment Science*. 2015; 15:1464–74.
46. Mahmood A, Malik RN, Shinwari ZK, Mahmood AQ. Ethnobotanical survey of plants from Neelum, Azad Jammu and Kashmir, Pakistan. *Pakistan Journal of Botany*. 2011. 1; 43(105):10.
47. Sher H, Elyemeni M, Sher H, Hussain K. Ethnobotanical and economic observations of some plant resources from the northern parts of Pakistan. *Ethnobotany Research and Applications*. 2011. 18; 9:027–41.
48. Hazrat A, Nisar MO, Shah J, Ahmad SH. Ethnobotanical study of some elite plants belonging to Dir, Kohistan valley, Khyber Pukhtunkhwa, Pakistan. *Pakistan Journal of Botany*. 2011. 1; 43(2):787–95.s
49. Kumar G P, Gupta S, Murugan M P, Bala Singh S. Ethnobotanical studies of Nubra Valley-A cold arid zone of Himalaya. *Ethnobotanical leaflets*. 2009. (6):9.
50. Swarnkar S, Katewa SS. Ethnobotanical observation on tuberous plants from tribal area of Rajasthan (India). *Ethnobotanical leaflets*. 2008. (1):87.
51. Chaudhari SK, Arshad M, Ahmed E, Mustafa G, Fatima S, Akhtar S, et al. Ethnobotanical evaluation of grasses from Thal Desert, Pakistan. *Archives of Science*. 2013. 66(5):248–55.
52. Mahmood A, Malik RN, Shinwari ZK, Mahmood AQ. Ethnobotanical survey of plants from Neelum, Azad Jammu and Kashmir, Pakistan. *Pakistan Journal of Botany*. 2011.1; 43(105):10.
53. Qureshi RA, Ghufuran MA, Gilani SA, Sultana K, Ashraf M. Ethnobotanical studies of selected medicinal plants of Sudhan gali and Ganga chotti hills, district bagh, Azad Kashmir. *Pakistan Journal of Botany*. 2007. 1; 39(7):2275–83.
54. Irfan M, Nabeela IK, Kamil M, Ullah S, Khan S, Shah M, et al. Ethnobotanical Survey of the Flora of Tehsil Balakot, District Mansehra, Khyber Pakhtunkhwa, Pakistan. *Journal of Applied Environmental and Biological Sciences*. 2018; 8(8):1–3.
55. Zabihullah Q, Rashid A, Akhtar N. Ethnobotanical survey in kot Manzaray Baba valley Malakand agency, Pakistan. *Pakistan Journal of Plant Sciences*. 2006; 12(2):115–21.
56. Amjad MS, Arshad M, Qureshi R. Ethnobotanical inventory and folk uses of indigenous plants from Pir Nasoor National Park, Azad Jammu and Kashmir. *Asian Pacific Journal of Tropical Biomedicine*. 2015. 1; 5(3):234–41.
57. Ishtiaq M, Iqbal P, Hussain T. Ethnobotanical uses of Gymnosperms of Neelum valley and Muzaffarabad of Kashmir, Pakistan, *Indian Journal of Traditional Knowledge*. 12 (3), 404–410.
58. As Hazrat, Nisar MO, Shah J, Ahmad SH. Ethnobotanical study of some elite plants belonging to Dir, Kohistan valley, Khyber Pakhtunkhwa, Pakistan. *Pakistan Journal of Botany*. 2011 Apr 1; 43(2):787–95.
59. Chaudhari SK, Arshad M, Ahmed E, Mustafa G, Fatima S, Akhtar S, et al. Ethnobotanical evaluation of grasses from Thal Desert, Pakistan. *Archives of Science*. 2013 66(5):248–55.
60. Singh V, Gaur RD, Bohra B. A survey of fodder plants in mid-altitude Himalayan rangelands of Uttarakhand, India. *Journal of Mountain Science*. 2008. 1; 5(3):265–78.
61. Ahmed E, Arshad M, Saboor A, Qureshi R, Mustafa G, Sadiq S, et al. Ethnobotanical appraisal and medicinal use of plants in Patriata, New Murree, evidence from Pakistan. *Journal of Ethnobiology and Ethnomedicine*. 2013. 1; 9(1):13. <https://doi.org/10.1186/1746-4269-9-13> PMID: 23445756
62. Pant S, Samant SS. Ethnobotanical observations in the Mornaula reserve forest of Komoun, West Himalaya, India. *Ethnobotanical Leaflets*. 2010; 2010(2):8.
63. Kilic O, Bagci E. An ethnobotanical survey of some medicinal plants in Keban (Elazığ-Turkey). *Journal of Medicinal Plants Research*. 2013. 17; 7(23):1675–84.
64. Demirci S. and Özhatay N. An ethnobotanical study in Kahramanmaraş (Turkey); wild plants used for medicinal purpose in Andirin, Kahramanmaraş. *Turkish Journal of Pharmacolical Sciences*. 2012. 9(1),75–92. <https://doi.org/10.1016/j.pld.2020.12.003> PMID: 33733012
65. Mahmood A, Malik RN, Shinwari ZK, Mahmood AQ. Ethnobotanical survey of plants from Neelum, Azad Jammu and Kashmir, Pakistan. *Pakistan Journal of Botany*. 2011.1; 43(105):10.
66. Rashid N., Gbedomon R.C., Ahmad M., Salako V.K., Zafar M. and Malik K., 2018. Traditional knowledge on herbal drinks among indigenous communities in Azad Jammu and Kashmir, Pakistan. *Journal of Ethnobiology and Ethnomedicine*, 14(1), p.16. <https://doi.org/10.1186/s13002-018-0217-8> PMID: 29467005
67. Kumar M., Paul Y. and Anand V.K. An ethnobotanical study of medicinal plants used by the locals in Kishtwar, Jammu and Kashmir, India. *Ethnobotanical Leaflets*, 2009(10), p.5.



68. Khan SW, Khatoon SU. Ethnobotanical studies on useful trees and shrubs of Haramosh and Bugrote valleys in Gilgit northern areas of Pakistan. *Pakistan Journal of Botany*. 2007. 1; 39(3):699–710.
69. Sinha D., 2019. A Review on Ethnobotanical, Phytochemical and Pharmacological Profile of *Pinus wallichiana* AB Jacks. *Pharmacognosy Journal*. 11(4).
70. Khan M.T., Hashim S., Ayub S., Jan A. and Marwat K.B., 2015. A case study of ethnobotany and biodiversity conservation from tehsil barawal, Upper Dir, Khyber pakhtunkhwa, Pakistan. *Pakistan Journal of Botany*. 47, 7–13.
71. Tardío J., Pardo-de-Santayana M. and Morales R. Ethnobotanical review of wild edible plants in Spain. *Botanical Journal of the Linnean Society*, 2008. 152(1), pp.27–71.
72. Jaiswal V. Culture and ethnobotany of Jaintia tribal community of Meghalaya, Northeast India-A mini review. 2010.
73. Ajaib M, Haider SK, Zikrea A. Ethnobotanical studies of shrubs and trees of Agra valley Parachinar, upper Kurram agency, Pakistan. *FUFAST Journal of Biology*. 2014. 2; 4(1):73–81.
74. Hussain F., Islam M. and Zaman A. Ethnobotanical profile of plants of Shawar Valley, District Swat, Pakistan. *International Journal of Biology and Biotechnology*, 2006. 3(2), pp.301–7.
75. Saqib Z. and Sultan A. Ethnobotany of Palas valley, Pakistan. *Ethnobotanical Leaflets*, 2004(1), 11.
76. Gilani S.A., Qureshi R.A. and Gilani S.J. Indigenous uses of some important ethnomedicinal herbs of Ayubia National Park, Abbottabad, Pakistan. *Ethnobotanical Leaflets*, 2006(1), 32.
